1 **A FACT-ETS-1 Antiviral Response Pathway Restricts Viral Replication and is Countered**  
2 **by Poxvirus A51R Proteins**

3

4 Emily A. Rex<sup>1</sup>, Dahee Seo<sup>1</sup>, Sruthi Chappidi<sup>2</sup>, Chelsea Pinkham<sup>2</sup>, Sabryna Brito Oliveira<sup>3</sup>, Aaron  
5 Embry<sup>1</sup>, David Heisler<sup>1</sup>, Yang Liu<sup>4</sup>, Karolin Luger<sup>4,5</sup>, Neal M. Alto<sup>1</sup>, Flávio Guimarães da Fonseca<sup>3</sup>,  
6 Robert Orchard<sup>1,2</sup>, Dustin Hancks<sup>2</sup> and Don B. Gammon<sup>1\*</sup>

7

8 <sup>1</sup>Department of Microbiology, University of Texas Southwestern Medical Center, Dallas, TX  
9 75390, USA

10 <sup>2</sup>Department of Immunology, University of Texas Southwestern Medical Center, Dallas, TX  
11 75390, USA

12 <sup>3</sup>Laboratório de Virologia Básica e Aplicada, Departamento de Microbiologia, Instituto de  
13 Ciências Biológicas, Universidade Federal de Minas Gerais, Belo Horizonte, MG, 31270-901,  
14 Brazil.

15 <sup>4</sup>Department of Biochemistry, University of Colorado Boulder, Boulder, CO 80309, USA

16 <sup>5</sup>Howard Hughes Medical Institute, Chevy Chase, MD, USA

17 \*Correspondence: don.gammon@utsouthwestern.edu

18

19

20 **Abstract**

21

22 The FACT complex is an ancient chromatin remodeling factor comprised of Spt16 and SSRP1  
23 subunits that regulates specific eukaryotic gene expression programs. However, whether FACT  
24 regulates host immune responses to infection was unclear. Here, we identify an antiviral pathway  
25 mediated by FACT, distinct from the interferon response, that restricts poxvirus replication. We  
26 show that early viral gene expression triggers nuclear accumulation of specialized, SUMOylated  
27 Spt16 subunits of FACT required for expression of ETS-1, a downstream transcription factor that  
28 activates a virus restriction program. However, poxvirus-encoded A51R proteins block ETS-1  
29 expression by outcompeting SSRP1 for binding to SUMOylated Spt16 in the cytosol and by  
30 tethering SUMOylated Spt16 to microtubules. Moreover, we show that A51R antagonism of FACT  
31 enhances both poxvirus replication in human cells and viral virulence in mice. Finally, we  
32 demonstrate that FACT also restricts unrelated RNA viruses, suggesting a broad role for FACT  
33 in antiviral immunity. Our study reveals the FACT-ETS-1 Antiviral Response (FEAR) pathway to  
34 be critical for eukaryotic antiviral immunity and describes a unique mechanism of viral immune  
35 evasion.

36

37 **Main**

38

39 Activation of antiviral gene expression after viral infection is a critical aspect of host antiviral  
40 responses. Key among these responses in mammals is the Type I Interferon (IFN) response,  
41 which induces hundreds of antiviral genes during infection<sup>1,2</sup>. The importance of the IFN response  
42 is underscored by the fact that virtually all mammalian viruses encode IFN antagonists<sup>1, 2</sup>.  
43 However, relatively little is known regarding antiviral transcriptional responses that evolved prior  
44 to vertebrate-specific IFN responses.

45

46 Poxviruses are large, cytoplasmic DNA viruses that infect animals and humans worldwide. For  
47 example, variola virus (VARV), the causative agent of smallpox, was responsible for one of the  
48 deadliest infectious diseases in human history<sup>3</sup>. Despite the successful eradication of smallpox  
49 by 1979, zoonotic poxvirus infections remain a major public health concern. This is underscored  
50 by the declaration by the World Health Organization that the 2022-2023 outbreak of Mpox  
51 (formerly known as “monkeypox”) is a public health emergency of international concern<sup>4, 5</sup>.  
52 Poxvirus infections are often highly pathogenic and associated with severe host immune  
53 suppression due to the action of poxvirus-encoded antagonists that inhibit various host immune  
54 responses<sup>6</sup>. Notably, the identification and characterization of poxviral immune evasion factors  
55 has often revealed new functional insights into the host factors and pathways they target<sup>7</sup>.

56

57 Previously, we showed the early A51R protein encoded by the mammalian poxvirus, vaccinia  
58 virus (VV), to be required for robust VV replication in mammalian cells and for virulence in mice<sup>8</sup>.  
59 Although A51R deficiency did not alter VV susceptibility to IFN treatment in mammalian cell  
60 cultures, curiously, A51R expression alone could promote RNA virus replication in non-permissive  
61 insect cells<sup>8</sup>. These observations suggested that A51R inhibits undefined eukaryotic antiviral  
62 responses that arose prior to the IFN response during evolution.

63

64 The human "Facilitates Chromatin Transcription" (FACT) complex is an evolutionarily-conserved,  
65 chromatin remodeler that requires interaction between human Suppressor of Ty 16 homolog  
66 (hSpt16) and Structure-Specific Recognition Protein-1 (SSRP1) subunits to function. FACT  
67 regulates mRNA transcription by controlling chromatin accessibility to transcriptional machinery<sup>9</sup>  
68 <sup>10, 11</sup>, but is not required for all mRNA transcription and instead localizes to discrete genomic loci  
69 to regulate specific cellular genes<sup>12, 13, 14</sup>. However, the biological relevance of FACT-mediated  
70 gene expression programs to immunity is largely unknown.

71  
72 Here, we reveal poxvirus A51R proteins to antagonize a novel, FACT-mediated antiviral pathway  
73 that is activated by poxvirus early gene expression. We demonstrate that VV A51R competes with  
74 SSRP1 to specifically, and directly, bind a novel SUMOylated form of hSpt16 in the cytoplasm of  
75 infected cells. This interaction tethers SUMOylated hSpt16 to microtubules (MTs), preventing its  
76 nuclear accumulation and activation of a FACT-dependent antiviral gene expression program  
77 distinct from the IFN response. Moreover, we show A51R proteins from multiple poxviruses  
78 specifically bind SUMOylated hSpt16, suggesting FACT antagonism is a conserved function of  
79 A51R proteins. We demonstrate that hSpt16 SUMOylation promotes hSpt16 binding to  
80 monoubiquitinated H2B histone (which marks active transcription sites in chromatin<sup>15</sup>) during  
81 infection to induce expression of ETS-1, a highly-conserved transcription factor (TF) that  
82 promotes restriction of A51R-deficient VV. Finally, we show that FACT also restricts unrelated  
83 cytoplasmic RNA viruses and that VV antagonism of FACT contributes to viral virulence in mice,  
84 establishing FACT as a critical component of antiviral immunity.

85

## 86 **Results**

87

### 88 **VV A51R Interacts with the hSpt16 Subunit of Human FACT**

89

90 To identify VV A51R-host interactions, we conducted a yeast two-hybrid screen with A51R bait  
91 and a human prey library. This screen identified hSpt16 as a top hit, with nine overlapping prey  
92 clones narrowing the putative A51R interaction domain to hSpt16 residues 758-893 within the  
93 middle domain (**Fig. 1a**). Co-immunoprecipitation (Co-IP) studies confirmed interaction between  
94 hSpt16 and Flag-A51R (FA51R) in A549 cells after infection with a VV strain expressing FA51R  
95 under its natural promoter ( $\Delta A51R^{FA51R}$ )<sup>8</sup> (**Fig. 1bc**). Notably, SSRP1 did not Co-IP with A51R  
96 (**Fig. 1b**), indicating that A51R exclusively interacts with the hSpt16 subunit of FACT.

97

### 98 **FACT Inhibits Cytoplasmic DNA and RNA Virus Replication**

99

100 Since FACT had not been shown to regulate cytoplasmic virus replication, we next used RNA  
101 interference (RNAi) to deplete FACT in cells prior to infection with either  $\Delta A51R^{FA51R}$  or A51R  
102 knockout ( $\Delta A51R$ )<sup>8</sup> strains to determine if FACT influences VV replication. It is important to note  
103 that under control RNAi treatments, the  $\Delta A51R$  strain replicates to ~10-30-fold lower titers than  
104 the revertant  $\Delta A51R^{FA51R}$  virus, consistent with the known replication defect of  $\Delta A51R$ <sup>8</sup>. Also, prior

105 work showed that mRNAs encoding hSpt16 and SSRP1 bind to the FACT subunit proteins  
106 themselves and stabilize the complex, thus RNAi targeting either hSpt16 or SSRP1 depletes both  
107 proteins<sup>16</sup> (**Fig. 1d**). While FACT depletion did not affect  $\Delta A51R^{FA51R}$  replication, multiple,  
108 independent hSpt16 or SSRP1 RNAi treatments enhanced  $\Delta A51R$  replication to titers  
109 indistinguishable from  $\Delta A51R^{FA51R}$  infections (**Fig. 1e**). Similar results were observed in primary  
110 neonatal human dermal fibroblast (NHDF) cells (**Fig. 1f**). These data suggest that FACT depletion  
111 complements the replication defect of A51R-deficient VV.

112  
113 We also examined negative-sense [vesicular stomatitis virus (VSV)]<sup>8</sup> and positive-sense [yellow  
114 fever virus (YFV)]<sup>17</sup> ssRNA viruses for changes in replication after FACT depletion. hSpt16 RNAi  
115 enhanced both VSV (**Fig. 1gh**) and YFV (**Fig. 1i**) replication, indicating that FACT broadly restricts  
116 cytoplasmic DNA and RNA viruses. We next focused on examining VV A51R-hSpt16 interactions  
117 in more detail to probe the role of FACT in antiviral immunity.

118  
119 **Poxvirus A51R Proteins Specifically, and Directly, Bind the Middle Domain of a novel,**  
120 **SUMOylated form of hSpt16 Using a Conserved Motif**

121  
122 Prior studies have presented hSpt16 as a single band on immunoblots<sup>16, 18</sup>. Indeed, hSpt16  
123 resolves as one band on 10% acrylamide gels (**Fig. 1bc**), but we observed two hSpt16 bands of  
124 ~140 and 155 kDa on 6% gels (**Fig. 2a**). Strikingly, A51R specifically bound only the larger hSpt16  
125 form (**Fig. 2a**). The ~15-20 kDa difference between bands suggested that the upper band may be  
126 a novel singly-SUMOylated form of hSpt16. Thus, we re-probed our Co-IP membranes in a  
127 separate channel with SUMO-1 antibodies (Ab) and found them to specifically bind the upper  
128 hSpt16 band (**Fig. 2a**). Reciprocal Co-IPs with hSpt16 Ab confirmed enrichment of both hSpt16  
129 forms and A51R interaction (**Fig. 2b**). To confirm hSpt16 SUMOylation, we treated cells with  
130 tannic acid (TA), a global SUMOylation inhibitor<sup>19</sup>. TA specifically depleted the upper hSpt16 band  
131 (**Fig. 2c**). In addition, only this upper hSpt16 band was enriched in SUMOylated protein fractions  
132 immunoprecipitated from cell extracts (**Fig. 2de**). Given the conservation of Spt16 among  
133 eukaryotes (**Extended Data Fig. 1a**), we assessed Spt16 SUMOylation in different human cell  
134 types and eukaryotic species. We found SUMOylated Spt16 in multiple human cell lines and  
135 primary NHDFs and in every monkey, mouse, hamster, rabbit, and bat cell line tested (**Extended**  
136 **Data Fig. 1bc**). Spt16 was also SUMOylated in insect cells and in *Caenorhabditis elegans* tissue  
137 extracts (**Extended Data Fig. 1d**), suggesting that this modification is conserved in invertebrates.  
138 From here, we refer to SUMOylated hSpt16 as "hSpt16<sup>SUMO</sup>".

139

140 To determine if hSpt16 SUMOylation is required for A51R interaction, we performed Co-IPs from  
141 VV-infected cells treated with TA. In the absence of TA, A51R pulled down hSpt16<sup>SUMO</sup>. However,  
142 interaction was lost after TA treatment (**Fig. 2f**), indicating that hSpt16 SUMOylation is required  
143 for A51R binding. Next, we used GFP-tagged VV A51R truncation mutants to identify a region  
144 between A51R a.a. 151-201 required for hSpt16<sup>SUMO</sup> interaction (**Fig. 2g**). Alignment of this region  
145 with other poxvirus A51R proteins sharing 35-95% a.a. identity to VV A51R (Extended Data  
146 **Fig. 1e**) revealed a conserved hydrophobic motif (VV A51R a.a. 158-162) (**Fig. 2h**). Substitution  
147 of motif residues with alanine (A51R<sup>158-162Ala</sup>) prevented VV A51R-hSpt16<sup>SUMO</sup> interaction (**Fig. 2i**),  
148 indicating a role for this motif in this interaction. Given the conservation of this motif, we tested  
149 ectromelia virus (ECTV), cowpox virus (CPXV), Yaba-like disease virus (YLDV), and Mpox virus  
150 (MPXV) A51R proteins for interaction with hSpt16<sup>SUMO</sup> and found all four to bind hSpt16<sup>SUMO</sup> (**Fig.**  
151 **2jk**). Thus, A51R-Spt16<sup>SUMO</sup> binding is a conserved poxvirus-host interaction.

152

153 We next determined if the putative A51R interaction domain in hSpt16 identified by yeast two-  
154 hybrid (a.a. 758-893; **Fig. 1a**) was required for A51R-hSpt16<sup>SUMO</sup> Co-IP. Deletion of this domain  
155 from HA-tagged hSpt16 prevented Co-IP with A51R (**Fig. 2l**), confirming its role in A51R  
156 interaction. Surprisingly, this deletion mutant still ran as two bands on immunoblots suggesting it  
157 is still SUMOylated (**Fig. 2l**). These data suggested that A51R may not interact with hSpt16  
158 through the SUMO moiety itself but rather SUMOylation may cause a conformational change in  
159 hSpt16 that exposes the A51R binding site. Consistent with this, a fragment encoding only hSpt16  
160 residues 758-893 ran as a single band on immunoblots but still interacted with A51R (**Fig. 2m**).

161

162 We next asked if purified, His-tagged A51R (His-A51R) protein directly interacts with Flag-tagged  
163 hSpt16 (Flag-hSpt16) purified from human cells. We confirmed that our Flag-hSpt16 protein was  
164 SUMOylated with ULP-1 protease treatment, which cleaves SUMO moieties<sup>20</sup> (**Fig. 2n**). Using  
165 reciprocal *in vitro* Co-IPs and pulldowns, we found His-A51R to Co-IP with Flag-hSpt16 in Flag  
166 Ab IPs and only the SUMOylated form of Flag-hSpt16 to bind His-A51R in nickel bead pulldowns  
167 (**Fig. 2op**), indicating a direct interaction. Notably, a His-A51R<sup>158-162Ala</sup> mutant did not Co-IP with  
168 Flag-hSpt16 (**Fig. 2o**).

169

170 **VV A51R Tethers hSpt16<sup>SUMO</sup> to MTs to Block hSpt16<sup>SUMO</sup> Nuclear Accumulation Triggered**  
171 **by Early VV Gene Expression.**

172

173 In cells, VV A51R exclusively localizes to cytosolic MTs<sup>8</sup> while hSpt16 functions in the nucleus<sup>21</sup>.  
174 Thus, we asked if A51R alters hSpt16 localization. Using a cell line expressing GFP-tagged  
175 hSpt16 (GFP-hSpt16), we found a portion of GFP-hSpt16 to colocalize with A51R in the cytosol  
176 in  $\Delta$ A51R<sup>FA51R</sup>-infected cells. In contrast, no such cytosolic GFP-hSpt16 enrichment was found in  
177 mock- or  $\Delta$ A51R-infected cells (**Fig. 3a**). This suggested that A51R may tether hSpt16<sup>SUMO</sup> to  
178 MTs. In another study (Seo et al., in prep), we identified a C-terminal A51R domain (a.a. 254-302)  
179 that resembles the MT-binding domain of Tau, a cellular MT-associated protein<sup>22</sup> (**Extended Data**  
180 **Fig. 2a**). A "triple" A51R mutant encoding R275A/K295A/K302A substitutions in this domain  
181 cannot colocalize with, or bundle, MTs or protect MTs from depolymerization by nocodazole,  
182 unlike WT A51R (**Extended Data Fig. 2b**). The A51R<sup>Triple</sup> mutant is also unable to co-sediment  
183 with MTs *in vitro* (**Fig. 3bc**), indicating these substitutions destroy direct A51R-tubulin interactions.  
184 However, A51R<sup>158-162Ala</sup> still co-sediments with MTs *in vitro* (**Fig. 3d**) and A51R<sup>Triple</sup> still interacts  
185 with hSpt16<sup>SUMO</sup> (**Fig. 3e**). Moreover, hSpt16 only interacted with tubulin when in the presence of  
186 A51R *in vitro* (**Fig. 3fg**). These data suggest that A51R tethers hSpt16<sup>SUMO</sup> to MTs by  
187 simultaneously binding hSpt16<sup>SUMO</sup> and tubulin through distinct domains.

188  
189 We next used cell fractionation to ask if the intracellular distribution of hSpt16 is altered during VV  
190 infection. Strikingly, hSpt16<sup>SUMO</sup> was specifically absent from cytosolic fractions in  $\Delta$ A51R-infected  
191 cells and only present in nuclear fractions, in contrast to mock- and  $\Delta$ A51R<sup>FA51R</sup>-infected cells  
192 (**Fig. 3hi**). This suggested that  $\Delta$ A51R infection either triggers changes in hSpt16 SUMOylation,  
193 hSpt16<sup>SUMO</sup> stability, or hSpt16<sup>SUMO</sup> cytosolic/nuclear distribution and that A51R blocks these  
194 infection-induced changes. However, total hSpt16<sup>SUMO</sup> levels did not overtly change in  $\Delta$ A51R-  
195 infected cells over a 24 h time-course (**Extended Data Fig. 3**). To examine changes in hSpt16  
196 nuclear localization, we first identified the hSpt16 nuclear localization signal (NLS) using NLS  
197 prediction software<sup>23, 24</sup>. We identified two conserved NLS motifs near the C-terminus of hSpt16  
198 (**Fig. 3j**) that, when deleted, prevented GFP-hSpt16 nuclear import (**Fig. 3k**). We then generated  
199 a GFP-hSpt16 <sup>$\Delta$ NLS</sup>-expressing cell line and found GFP-hSpt16 <sup>$\Delta$ NLS</sup> to still be SUMOylated,  
200 indicating that SUMOylation occurs in the cytosol, but it remained in the cytosol after  $\Delta$ A51R  
201 infection (**Fig. 3lm**). These data suggest that A51R inhibits infection-triggered hSpt16<sup>SUMO</sup> nuclear  
202 accumulation.

203  
204 To determine which step of the VV life cycle was required for hSpt16<sup>SUMO</sup> nuclear accumulation,  
205 we first analyzed the timing of hSpt16<sup>SUMO</sup> cytosolic/nuclear distribution changes after  $\Delta$ A51R

206 infection. We found hSpt16<sup>SUMO</sup> nuclear accumulation to occur by 4 hpi (**Fig. 3n**), a time at which  
207 VV is known to initiate VV DNA replication and late gene expression. Since VV DNA replication  
208 occurs prior to late gene expression, we next analyzed hSpt16<sup>SUMO</sup> cytosolic/nuclear distribution  
209 during  $\Delta$ A51R infection in the presence of cytosine arabinoside (AraC), a VV DNA replication  
210 inhibitor<sup>8</sup>. Interestingly, AraC did not block  $\Delta$ A51R-induced nuclear accumulation of hSpt16<sup>SUMO</sup>  
211 (**Fig. 3o**), suggesting that a step in the VV life cycle prior to VV DNA replication such as entry or  
212 early gene expression triggers hSpt16<sup>SUMO</sup> nuclear accumulation. Thus, we employed a heat  
213 inactivation protocol that allows virion entry, but inactivates early VV gene expression<sup>8</sup>. Heat  
214 treatment completely abrogated  $\Delta$ A51R-induced hSpt16<sup>SUMO</sup> nuclear accumulation, suggesting  
215 that early VV gene expression is required to trigger this host response (**Fig. 3p**).

216

### 217 **VV A51R Outcompetes SSRP1 to Inhibit hSpt16<sup>SUMO</sup>-SSRP1 Interaction**

218

219 To ask if A51R affects hSpt16-SSRP1 interaction, we examined GFP-hSpt16-SSRP1 Co-IP in  
220 U2OS cells expressing GFP-hSpt16 during mock,  $\Delta$ A51R<sup>FA51R</sup>, or  $\Delta$ A51R infection. Compared to  
221 mock- and  $\Delta$ A51R-infected lysates, the amount of SSRP1 bound to GFP-hSpt16 was reduced in  
222  $\Delta$ A51R<sup>FA51R</sup> lysates (**Fig. 4a**). SSRP1 Ab Co-IPs in parental U2OS cells also showed reduced  
223 hSpt16<sup>SUMO</sup>-SSRP1 interaction in  $\Delta$ A51R<sup>FA51R</sup> lysates (**Fig. 4b**). This implied that A51R competes  
224 with SSRP1 for hSpt16<sup>SUMO</sup> binding, so we examined the ability of His-A51R and His-tagged  
225 SSRP1 (His-SSRP1) to compete for Flag-hSpt16 binding *in vitro*. We first confirmed that purified  
226 Flag-hSpt16 and His-SSRP1 proteins interacted as expected using reciprocal pulldowns (**Fig.**  
227 **4cd**). Of note, we did not observe differences in His-SSRP1 affinity for SUMOylated/SUMOless  
228 Flag-hSpt16 (**Fig. 4d**). We next incubated increasing amounts of His-SSRP1 with preformed His-  
229 A51R-Flag-hSpt16<sup>SUMO</sup> complexes and then conducted SSRP1 Ab Co-IPs to assess the relative  
230 amounts of Flag-hSpt16<sup>SUMO</sup> bound to His-SSRP1. Even at a 10-fold molar excess of His-  
231 SSRP1:His-A51R, Flag-hSpt16<sup>SUMO</sup> did not interact with His-SSRP1 in the presence of His-A51R.  
232 However, His-SSRP1 interacted efficiently with Flag-hSpt16<sup>SUMO</sup> in the absence of His-A51R (**Fig.**  
233 **4ef**), suggesting that His-SSRP1 poorly competes with His-A51R for Flag-hSpt16<sup>SUMO</sup>. Consistent  
234 with this, when increasing amounts of His-A51R were added to preformed His-SSRP1-Flag-  
235 hSpt16 complexes, His-SSRP1-Flag-hSpt16 interaction decreased with increasing His-A51R  
236 (**Fig. 4gh**). These data suggest that A51R can outcompete with SSRP1 for binding to hSpt16<sup>SUMO</sup>  
237 to disrupt FACT complex formation.

238

### 239 **hSpt16<sup>SUMO</sup> Nuclear Localization is Required for Virus Restriction**

240

241 To determine if hSpt16<sup>SUMO</sup> nuclear localization is required for VV restriction, we infected GFP-  
242 hSpt16- or GFP-hSpt16<sup>ΔNLS</sup>-expressing cells with ΔA51R<sup>FA51R</sup> or ΔA51R strains after RNAi-  
243 mediated depletion of endogenous hSpt16. Normally, hSpt16 RNAi depletes both hSpt16 and  
244 SSRP1 because of the stabilization of FACT subunits by their own mRNAs. However, expression  
245 of GFP-hSpt16 mRNA can stabilize SSRP1 protein levels<sup>16</sup>. Thus, we used hSpt16 RNAi  
246 designed to target the endogenous *hSpt16* gene (but not the *GFP-hSpt16* gene) to specifically  
247 deplete endogenous hSpt16 proteins while retaining SSRP1 levels (**Fig. 5a**). Interestingly, ΔA51R  
248 replicated to higher titers in cells expressing GFP-hSpt16<sup>ΔNLS</sup>, but not WT GFP-hSpt16, after  
249 endogenous hSpt16 depletion (**Fig. 5b**), suggesting that hSpt16<sup>SUMO</sup> nuclear import is required  
250 for its antiviral function.

251

### 252 **Only SUMOylated hSpt16 Binds Transcriptionally Active Chromatin During Infection**

253

254 Since FACT interacts with nucleosomes to regulate gene expression, we asked if hSpt16  
255 SUMOylation influenced such interactions. However, no differences were found in the ability of  
256 Flag-hSpt16/hSpt16<sup>SUMO</sup> to interact with purified histone complexes *in vitro* (**Extended Data Fig.**  
257 **4a**). Furthermore, deSUMOylation of purified FACT with ULP-1 did not alter FACT binding to  
258 reconstituted (H3-H4)<sub>2</sub> tetrasomes or (H2A-H2B)-(H3-H4)<sub>2</sub> hexasomes *in vitro* (**Extended Data**  
259 **Fig. 4b**). Prior work showed FACT to associate with K120-monoubiquitinated H2B  
260 (H2BK120ub)<sup>25, 26</sup>, which marks active transcription sites in chromatin<sup>15</sup>. Since H2B proteins used  
261 in our *in vitro* assays were purified from bacteria, they lack ubiquitination. Therefore, we examined  
262 hSpt16/hSpt16<sup>SUMO</sup> binding to H2BK120ub in nuclear extracts. In the absence of VV infection,  
263 both hSpt16 forms bound H2BK120ub. However, only hSpt16<sup>SUMO</sup> bound H2BK120ub during  
264 infection and this interaction was reduced during ΔA51R<sup>FA51R</sup> infection (**Fig. 5c**). This suggests  
265 that hSpt16 requires SUMOylation to bind H2BK120ub during infection and A51R inhibits this  
266 interaction.

267

### 268 **VV A51R Inhibits FACT-Dependent Expression of an Antiviral Transcription Factor**

269

270 The previous results led us to hypothesize that hSpt16<sup>SUMO</sup> activates FACT-dependent antiviral  
271 gene expression to restrict virus replication. To identify cellular genes regulated by FACT during  
272 infection, we extracted total RNA from A549 cells expressing control or hSpt16-targeted short  
273 hairpin RNA after 4 h of mock, ΔA51R<sup>FA51R</sup>, or ΔA51R infection, and used mRNA-sequencing



274 (RNA-seq) to identify differentially expressed genes (DEGs) after FACT depletion. We chose 4  
275 hpi as our time point because hSpt16<sup>SUMO</sup> nuclear accumulation occurs by that time (**Fig. 3n**).

276

277 Between mock-,  $\Delta$ A51R<sup>FA51R</sup>- and  $\Delta$ A51R-infected treatments, we identified 5703 DEGs after  
278 hSpt16 RNAi in at least one of these three infection conditions (**Figure 5d; Supplementary Table**  
279 **1a-e**). We then cross-referenced these "hSpt16-regulated genes" with the 1248 DEGs between  
280  $\Delta$ A51R<sup>FA51R</sup> and  $\Delta$ A51R infections in control RNAi cells ("A51R-regulated genes")  
281 (**Supplementary Table 1f**). This identified 840 genes that are differentially expressed after  
282 hSpt16 RNAi and in the presence of A51R expression (**Fig. 5d; Supplementary Table 1g**). We  
283 reasoned that A51R likely inhibits FACT-dependent expression of immunity genes, so we  
284 analyzed these 840 genes for immunity-related gene ontology classifications and identified 76  
285 known immunity genes that were down-regulated in both hSpt16 RNAi treatments and in the  
286 presence of A51R. Notably, only ~6% of these 76 genes are IFN-stimulated genes in A549 cells<sup>27</sup>,  
287 <sup>28</sup> (**Supplementary Table 1h**), suggesting that FACT-induced antiviral responses are distinct from  
288 the IFN pathway.

289

290 As master regulators of transcription, we suspected that TFs were likely involved in FACT-  
291 dependent antiviral responses. Among the identified 76 hSpt16/A51R-regulated immunity genes  
292 were 8 TFs (**Fig. 5e**). Using RNAi, we screened these TFs for potential antiviral function during  
293  $\Delta$ A51R<sup>FA51R</sup> or  $\Delta$ A51R infection and identified ETS-1 as our only hit. ETS-1 is a member of the  
294 evolutionarily-conserved "E26 transformation specific (ETS)" TF family<sup>29</sup> and was recently  
295 implicated in the immune response to bacterial infection<sup>30</sup>, but it was unclear if ETS-1 also  
296 functions in antiviral immunity. Interestingly, ETS-1 RNAi enhanced  $\Delta$ A51R, but not  $\Delta$ A51R<sup>FA51R</sup>,  
297 replication (**Fig. 5fg**). In side-by-side RNAi experiments with both VV strains, ETS-1 RNAi  
298 enhanced  $\Delta$ A51R replication to levels that were indistinguishable from  $\Delta$ A51R<sup>FA51R</sup> (**Fig. 5h**),  
299 suggesting that like hSpt16 RNAi (**Fig. 1ef**), ETS-1 knockdown complements  $\Delta$ A51R replication  
300 defects. Notably, the related ETS-2 TF was also hSpt16/A51R-regulated (**Fig. 5e**), but its  
301 knockdown did not affect VV replication (**Fig. 5fg,i**).

302

303 To determine the VV life cycle step required to trigger ETS-1 expression, we first analyzed the  
304 timing of ETS-1 expression after VV infection. We found ETS-1 induction during  $\Delta$ A51R infection  
305 to occur by 4 hpi (**Extended Data Fig. 5a**) and to require early VV gene expression (**Extended**  
306 **Data Fig. 5b**), but not VV DNA replication (**Extended Data Fig. 5c**), which is consistent with the

307 timing and requirements for  $\Delta A51R$ -triggered hSpt16<sup>SUMO</sup> nuclear accumulation (**Fig. 3n-p**). We  
308 next determined if ETS-1 protein levels change during VV infection in the absence or presence of  
309 hSpt16 RNAi. Consistent with our RNA-seq, ETS-1 was induced during virus infection in an  
310 hSpt16-dependent manner. However, stronger ETS-1 induction occurred in  $\Delta A51R$  infections  
311 (**Fig. 5j**), suggesting this mutant has a reduced ability to block ETS-1 expression. Notably, no  
312 differences in IFN pathway activation were noted when comparing  $\Delta A51R$  versus  $\Delta A51R^{FA51R}$   
313 infections under control or hSpt16 RNAi conditions (**Extended Data Fig. 6**), supporting the idea  
314 that FACT-induced antiviral responses are distinct from the IFN pathway.

315  
316 A prior chromatin immunoprecipitation (ChIP)-sequencing study found hSpt16 and SSRP1 to bind  
317 the *ets-1* gene, with strongest binding peaks occurring in a promoter-proximal region<sup>31</sup>. Thus, we  
318 PCR- amplified a DNA fragment encompassing this *ets-1* promoter-proximal region after ChIP  
319 with hSpt16 Ab to determine if ETS-1 expression during infection correlated with hSpt16 binding  
320 to the *ets-1* gene. We found similar hSpt16 binding to *ets-1* in mock- and  $\Delta A51R^{FA51R}$  infections  
321 but enhanced binding during  $\Delta A51R$  infection (**Fig. 5k**), suggesting that FACT binds the *ets-1*  
322 locus during infection to promote expression and virus restriction while A51R antagonizes *ets-1*  
323 expression.

### 324 325 **hSpt16<sup>SUMO</sup> is Required for ETS-1 Expression and Virus Restriction**

326  
327 We hypothesized that ETS-1 expression requires hSpt16<sup>SUMO</sup> because A51R binds hSpt16<sup>SUMO</sup>  
328 and inhibits ETS-1 induction. Thus, we sought to identify the hSpt16 SUMOylation site to construct  
329 a SUMOless mutant to test this hypothesis. However, after systematically converting all lysine (K)  
330 residues within ~50-200 a.a. stretches across HA-hSpt16 to alanine (A), no SUMOless mutants  
331 were found (**Extended Data Fig. 7ab**), but combining all 33 K to A substitutions across a.a. 457-  
332 830, produced a SUMOless hSpt16 protein (**Extended Data Fig. 7c**). Thus, hSpt16 appears to  
333 have several potential SUMOylation sites within a.a. 457-830 but these sites are likely mutually  
334 exclusive since we only ever observe mono-SUMOylated hSpt16 species on immunoblots.

335  
336 Given the many K to A substitutions required to produce SUMOless hSpt16, we were concerned  
337 about pleiotropic effects on hSpt16 folding or function. Thus, we screened for alternative  
338 SUMOless mutants and identified a small motif (a.a. 549-554) within the hSpt16 dimerization  
339 domain required for SUMOylation (**Fig. 6a**). This motif does not contain K residues, but it is well-  
340 conserved among eukaryotes (**Fig. 6b**) and may interact with SUMOylation machinery. Notably,

341 alanine substitutions of nearby K residues flanking this motif did not affect hSpt16 SUMOylation  
342 (**Extended Data Fig. 7d**). Further alanine mutagenesis within this motif revealed I554 to be  
343 required for hSpt16 SUMOylation (**Fig. 6c**). An HA-hSpt16<sup>I554A</sup> mutant was still capable of nuclear  
344 localization (**Fig. 6d**) and SSRP1 interaction (**Fig. 6e**). However, it was severely impaired in A51R  
345 binding (**Fig. 6f**). Using GFP-hSpt16<sup>I554A</sup>-expressing cell lines, we next examined ETS-1  
346 expression during mock-,  $\Delta$ A51R<sup>FA51R</sup>- and  $\Delta$ A51R-infections when endogenous hSpt16 was  
347 depleted by RNAi (as in **Fig. 5a**). In GFP-hSpt16-expressing cells,  $\Delta$ A51R induced higher ETS-1  
348 expression compared to  $\Delta$ A51R<sup>FA51R</sup> as expected, but this induction was largely abrogated in  
349 GFP-hSpt16<sup>I554A</sup>-expressing cells after knockdown of endogenous hSpt16 (**Fig. 6g**). Furthermore,  
350 loss of ETS-1 expression was concomitant with increases in  $\Delta$ A51R replication to titers  
351 comparable to  $\Delta$ A51R<sup>FA51R</sup> (**Fig. 6h**). Collectively, these data suggest that hSpt16<sup>SUMO</sup> is required  
352 for ETS-1 expression and virus restriction.

353

### 354 **VV A51R-hSpt16<sup>SUMO</sup> Interaction Inhibits ETS-1 Expression and Promotes VV Virulence**

355

356 Next, we asked if A51R-hSpt16<sup>SUMO</sup> interaction contributes to ETS-1 expression inhibition by VV.  
357 Therefore, we constructed a VV revertant strain encoding the hSpt16<sup>SUMO</sup> interaction-deficient  
358 A51R<sup>158-162Ala</sup> mutant ( $\Delta$ A51R<sup>FA51R158-162Ala</sup>) and compared its ability to suppress ETS-1 induction  
359 to  $\Delta$ A51R<sup>FA51R</sup>. The  $\Delta$ A51R<sup>FA51R158-162Ala</sup> mutant displayed a reduced ability to antagonize ETS-1  
360 expression, suggesting that A51R-hSpt16<sup>SUMO</sup> interaction inhibits ETS-1 induction after infection  
361 (**Fig. 6i**). Finally, we asked if FACT antagonism influences VV pathogenesis in mice by comparing  
362 the virulence of  $\Delta$ A51R<sup>FA51R158-162Ala</sup> and  $\Delta$ A51R<sup>FA51R</sup> strains after intranasal inoculation. Mice  
363 inoculated with A51R<sup>158-162Ala</sup> exhibited greater survival than  $\Delta$ A51R<sup>FA51R</sup>-infected animals (**Fig.**  
364 **6j**), indicating that FACT antagonism promotes VV virulence.

365

### 366 **Discussion**

367

368 Our study reveals that early VV gene expression triggers FACT-dependent ETS-1 expression that  
369 subsequently restricts viral replication. We term this host response the "FACT-ETS-1 Antiviral  
370 Response (FEAR)" Pathway. Central to the activation of this pathway is hSpt16 SUMOylation,  
371 which licenses FACT to bind transcriptionally active chromatin during infection. Given that Spt16  
372 SUMOylation was wide spread among the mammalian and invertebrate species tested,  
373 SUMOylation may be an ancient mechanism to regulate antiviral FACT function. The

374 physiological relevance of the FEAR pathway is underscored by our finding that VV A51R  
375 counters this pathway by competing with SSRP1 to bind hSpt16<sup>SUMO</sup> and tether it to MTs to block  
376 its nuclear accumulation (**Fig. 6k**). Moreover, the reduced pathogenicity of VV strains encoding  
377 A51R substitutions that prevent hSpt16<sup>SUMO</sup> interaction, highlight the contribution of this virus-host  
378 interaction to viral disease. Given that A51R proteins from other poxviruses (e.g. ECTV, CPXV,  
379 YLDV, etc.) all bind hSpt16<sup>SUMO</sup> (**Fig. 2jk**) and associate with MTs<sup>8</sup>, it is clear that FACT  
380 antagonism is an important poxvirus immune evasion mechanism.

381  
382 Inducible transcriptional responses to infection have long been recognized as integral aspects of  
383 antiviral immunity<sup>32, 33, 34</sup>. However, prior studies have primarily focused on the role of TFs in  
384 activating such responses and on the IFN pathway in particular<sup>35</sup>. Our work suggests that both  
385 chromatin remodeling proteins (FACT) and TFs (ETS-1) serve critical roles in activating the host  
386 transcriptional response to infection. Like FACT, ETS transcription factors are ancient eukaryotic  
387 factors, having originated ~600 million years ago in invertebrate metazoans<sup>29</sup>. Thus, the FEAR  
388 pathway appears to both predate and be distinct from, the IFN response. However, only recently  
389 was ETS-1 implicated in the host response to microbial infection in bacterial studies where its  
390 expression was shown to induced by infection to activate proinflammatory gene expression<sup>30</sup>. Our  
391 data indicate that ETS-1 also restricts virus replication and is induced by virus infection in an  
392 hSpt16<sup>SUMO</sup>/FACT-dependent manner. Thus, ETS-1 appears to play a broad antimicrobial role in  
393 eukaryotes. Further studies are needed to identify genes regulated by ETS-1 during viral infection  
394 and their roles in virus restriction. Understanding how FACT is both activated, and potentially  
395 countered, by RNA viruses will also be important to determine.

396  
397 Notably, ETS-1 is a proto-oncoprotein and its upregulation is associated with cancer cell  
398 invasiveness and poor survival of cancer patients<sup>36, 37</sup>. Thus, our finding that ETS-1 induction  
399 requires hSpt16<sup>SUMO</sup> function may yield insights into how FACT overexpression promotes  
400 oncogenic gene expression and poor outcomes in patients afflicted with malignancies<sup>12, 13</sup>. Thus,  
401 our study highlights how characterizing novel viral immune evasion proteins can not only uncover  
402 new host antiviral pathways and mechanisms of their regulation, but may also provide tools for  
403 probing the function of these pathways in other human etiologies.

404

405 **Figures**

Figure 1

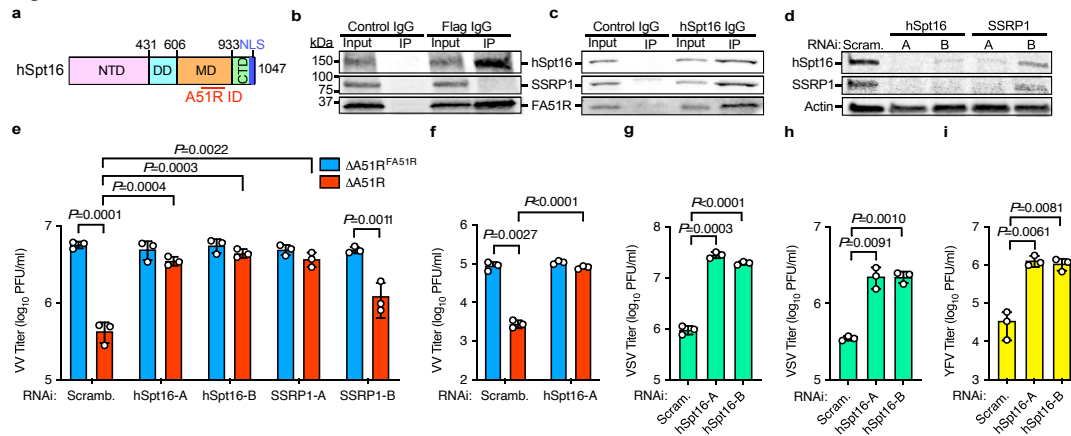

406

407 **Figure 1| VV A51R interacts with hSpt16 and FACT depletion promotes cytoplasmic virus**  
 408 **replication.**

409 **a**, Putative A51R interaction domain (ID) from yeast two-hybrid mapped onto hSpt16. NTD, N-  
 410 terminal Domain; DD, Dimerization Domain; MD, Middle Domain; CTD, C-terminal Domain<sup>21</sup>.

411 **b,c**, Immunoblots (IB) of reciprocal Co-IPs of endogenous hSpt16 with Flag-A51R (FA51R) in  
 412  $\Delta$ A51R<sup>FA51R</sup>-infected A549 whole cell extract (WCE) using 10% protein gels.

413 **d**, IB of A549 WCE 48 h after indicated RNAi. Scram., scrambled.

414 **e,f**, VV titers 48 hpi [multiplicity of infection (MOI)=0.01] in A549 (**e**) or NHDF (**f**) cell cultures  
 415 transfected with indicated RNAi treatments as in (**d**).

416 **g,h**, VSV-GFP<sup>8</sup> titers 24 hpi (MOI=0.001) in A549 (**g**) and NHDF (**h**) cells transfected with  
 417 indicated RNAi treatments as in (**d**).

418 **i**, YFV-17D-Venus<sup>38</sup> titers 24 hpi (MOI=0.01) in A549 cells transfected with indicated RNAi  
 419 treatments as in (**d**). Data in **e-g** are means  $\pm$  SD; n=3 and statistical significance was determined  
 420 by unpaired two-tailed Student's t-test. Only statistical comparisons with  $P < 0.05$  are shown.

421

422

423

424

425

426

427

428

429

430

Figure 2

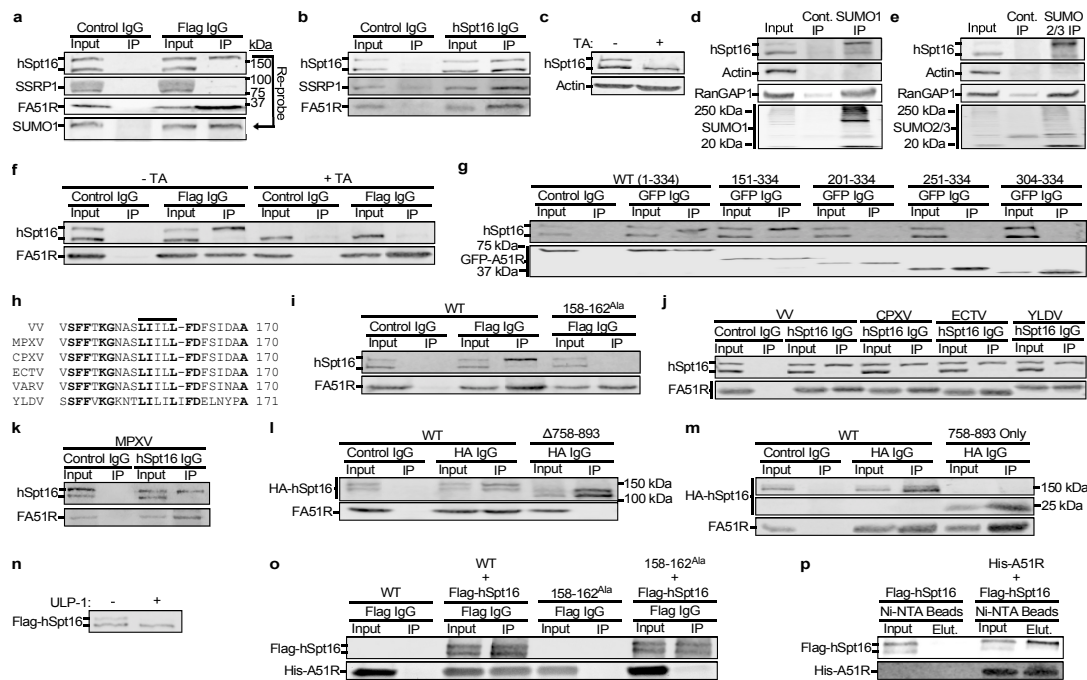

431  
432  
433 **Figure 2| Poxvirus A51R proteins specifically, and directly, bind the middle domain of a**  
434 **novel, SUMOylated form of hSpt16 using a conserved motif.**

435 **a,b,** Reciprocal Co-IPs of hSpt16 with FA51R in  $\Delta A51R^{FA51R}$ -infected A549 WCE using 6% gels.

436 **c,** hSpt16 IB of WCE from A549 cells treated with TA.

437 **d,e,** IB of immunoprecipitated SUMO-1- (**d**) or SUMO-2/3- (**e**) conjugated protein fractions in A549  
438 WCE. RanGAP1 is a known SUMOylated protein and used as a control<sup>39</sup>.

439 **f,** hSpt16-FA51R Co-IP in  $\Delta A51R^{FA51R}$ -infected A549 WCE  $\pm$  TA treatment.

440 **g,** Co-IP of transfected VV GFP-A51R truncation mutants encoding indicated A51R residues with  
441 hSpt16 in 293T WCE.

442 **h,** Conservation of hydrophobic motif (horizontal line) in poxvirus A51R proteins.

443 **i,** Co-IP of transfected VV FA51R constructs with hSpt16 in 293T WCE.

444 **j,** Co-IP of transfected Flag-tagged poxvirus A51R proteins with hSpt16 in 293T WCE.

445 **k,** Co-IP of transfected VV FA51R and HA-hSpt16 constructs in 293T WCE.

446 **l,** IB of HA-hSpt16-transfected 293T WCE  $\pm$  TA treatment.

447 **m,** Co-IP of transfected VV FA51R and HA-hSpt16 constructs in 293T WCE.

448 **n,** IB of purified Flag-hSpt16 protein  $\pm$  ULP-1 treatment.

449 **o,** *in vitro* Co-IP of Flag-hSpt16 with WT or mutant His-A51R.

450 **p,** *in vitro* nickel bead pull-down of WT His-A51R and Flag-hSpt16.

451 Images in **a-p** are representative of at least two independent experiments.

Figure 3

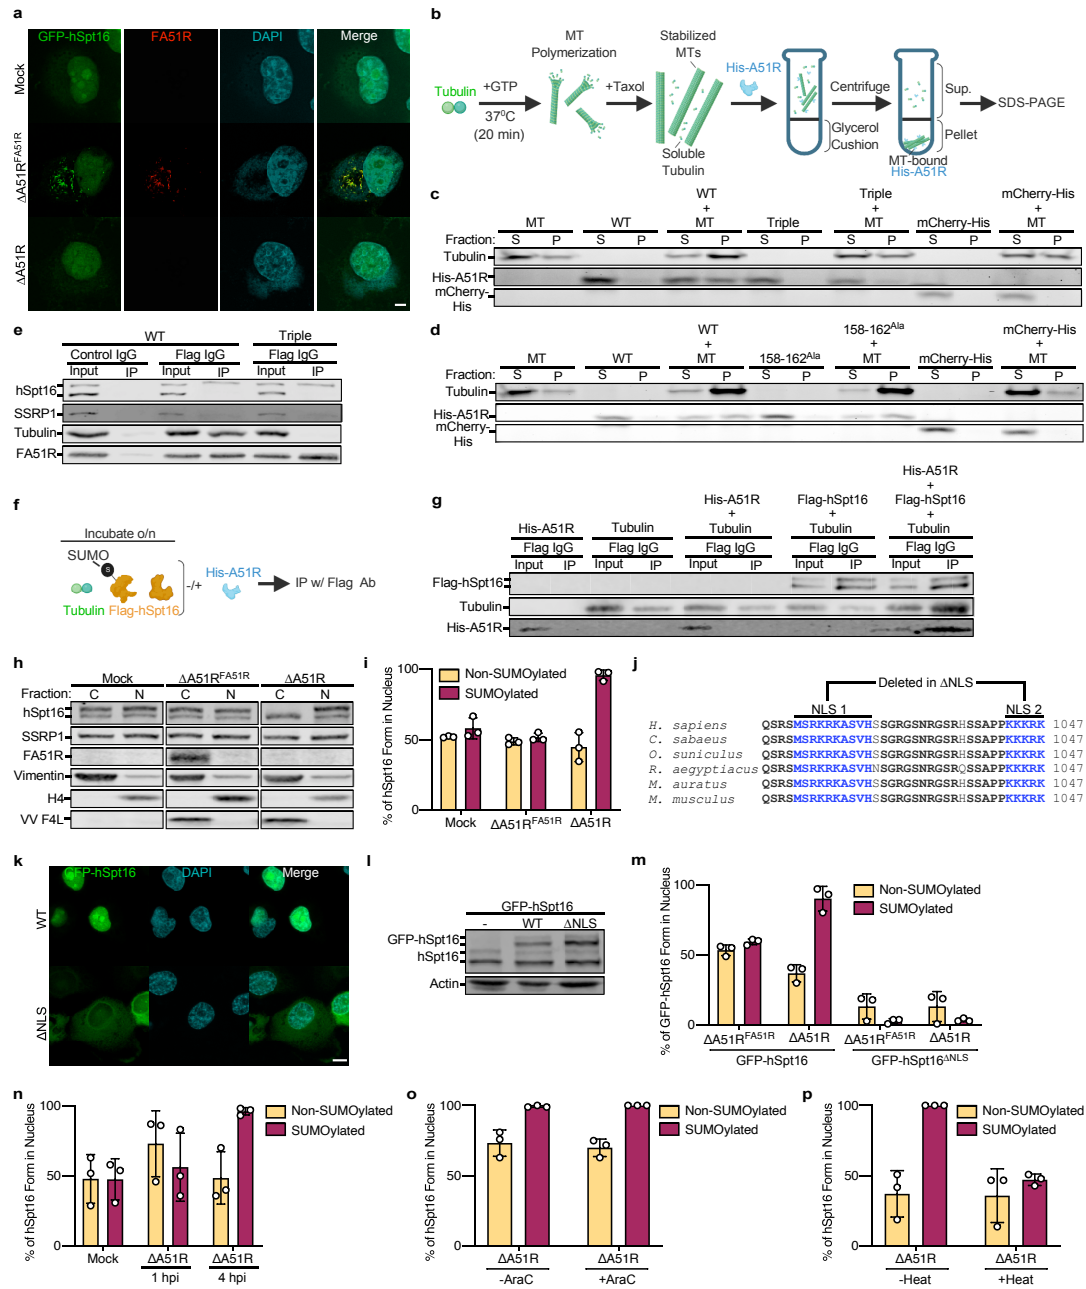

452

453

454 **Figure 3| VV A51R tethers hSpt16<sup>SUMO</sup> to MTs to block hSpt16<sup>SUMO</sup> nuclear accumulation**  
 455 **triggered by VV early gene expression.**

456 **a**, Immunofluorescence (IF) images of GFP-hSpt16-expressing U2OS cells 18 hpi with VV strains.  
 457 Cytosolic DAPI staining marks VV infection. Scale bar, 5 μm.

458 **b**, Overview of *in vitro* MT co-sedimentation assay.

459 **c,d**, *in vitro* MT co-sedimentation assays with purified WT and mutant His-A51R.

460 **e**, Co-IP of transfected WT and mutant FA51R constructs with hSpt16 and tubulin in 293T WCE.

461 **f**, Overview of *in vitro* Flag-hSpt16 Co-IP with tubulin in the absence/presence of His-A51R.  
462 **g**, *in vitro* Co-IP of purified Flag-hSpt16, His-A51R and tubulin.  
463 **h,i**, Representative IB (**h**) and quantification (**i**) of U2OS cytoplasmic (C) and nuclear (N) fractions  
464 18 hpi with VV strains. VV F4L marks infection. Data in **i** are means  $\pm$  SD; n=3.  
465 **j**, hSpt16 NLS motifs deleted in  $\Delta$ NLS mutant and their conservation in eukaryotic Spt16 proteins.  
466 **k**, Representative IF images of WT or  $\Delta$ NLS GFP-hSpt16 U2OS cells. Scale bar, 10  $\mu$ m.  
467 **l**, IB of WCE from U2OS cells expressing WT or  $\Delta$ NLS GFP-hSpt16 proteins.  
468 **m**, Quantification of fractionation experiments of WT or  $\Delta$ NLS GFP-hSpt16-expressing U2OS  
469 cells infected with VV strains for 18 h. Data are means  $\pm$  SD; n=3.  
470 **n**, Quantification of fractionation experiments of A549 cells mock- or  $\Delta$ A51R-infected for indicated  
471 times. Data are means  $\pm$  SD; n=3.  
472 **o**, Quantification of fractionation experiments of U2OS cells infected with  $\Delta$ A51R strain for 4 h.  
473 Where indicated, AraC was added to media 1 hpi. Data are means  $\pm$  SD; n=3.  
474 **p**, Quantification of fractionation experiments of U2OS cells infected with  $\Delta$ A51R strain for 4 h.  
475 Where indicated,  $\Delta$ A51R was heat-inactivated prior to infection. Data are means  $\pm$  SD; n=3.  
476 Images in **a**, **c-e**, **g-h**, and **k-l** are representative of at least two independent experiments.  
477  
478  
479  
480  
481  
482  
483  
484  
485  
486  
487  
488  
489  
490  
491  
492  
493



Figure 4

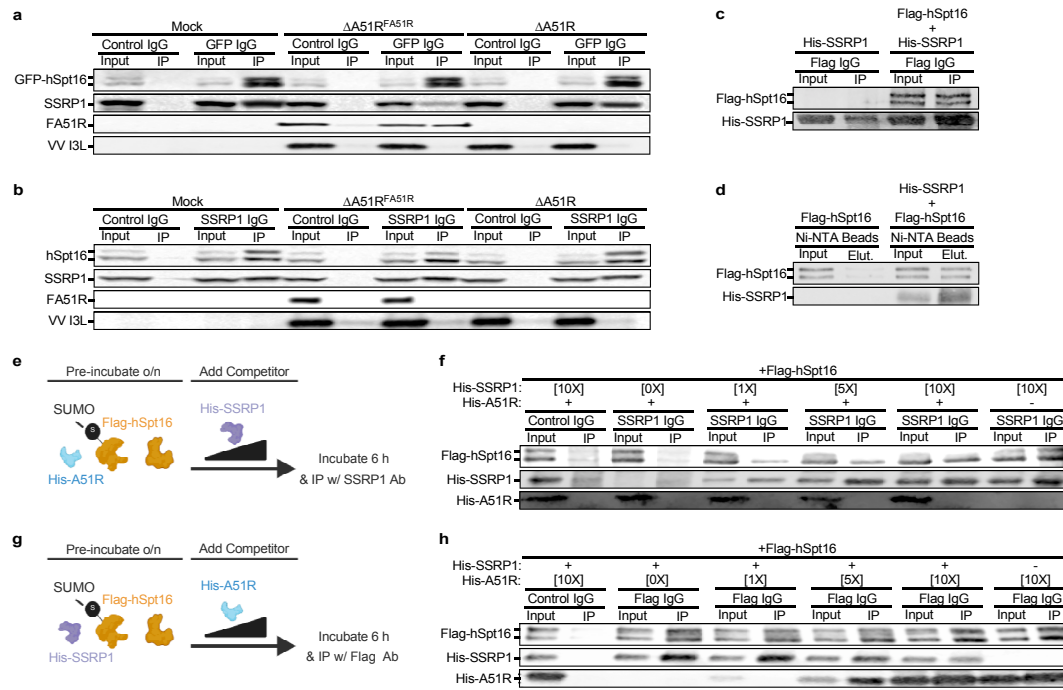

494

495

496

**Figure 4| VV A51R outcompetes SSRP1 to inhibit hSpt16<sup>SUMO</sup>-SSRP1 interaction.**

497 **a**, IB of GFP-hSpt16-SSRP1 Co-IP in GFP-hSpt16-expressing U2OS WCE 18 hpi with VV strains.  
 498 VV I3L marks infection.

499 **b**, IB of hSpt16-SSRP1 Co-IP in U2OS WCE 18 hpi with VV strains.

500 **c,d**, *in vitro* Co-IP (**c**) and pulldown (**d**) assays with purified Flag-hSpt16 and His-SSRP1.

501 **e-h**, *in vitro* competition assays with preformed complexes of Flag-hSpt16-His-A51R (**e,f**) or Flag-  
 502 hSpt16-His-SSRP1 (**g,h**) incubated with increasing molar ratios of His-SSRP1 (**e,f**) or His-A51R  
 503 (**g,h**) and then subjected to SSRP1 Ab IP (**e,f**) or Flag Ab IP (**g,h**).

504 Images in **a-f** are representative of at least two independent experiments. Images in **e** and **g** were  
 505 made with biorender.com.

506

507

508

509

510

511

512

513

514

Figure 5

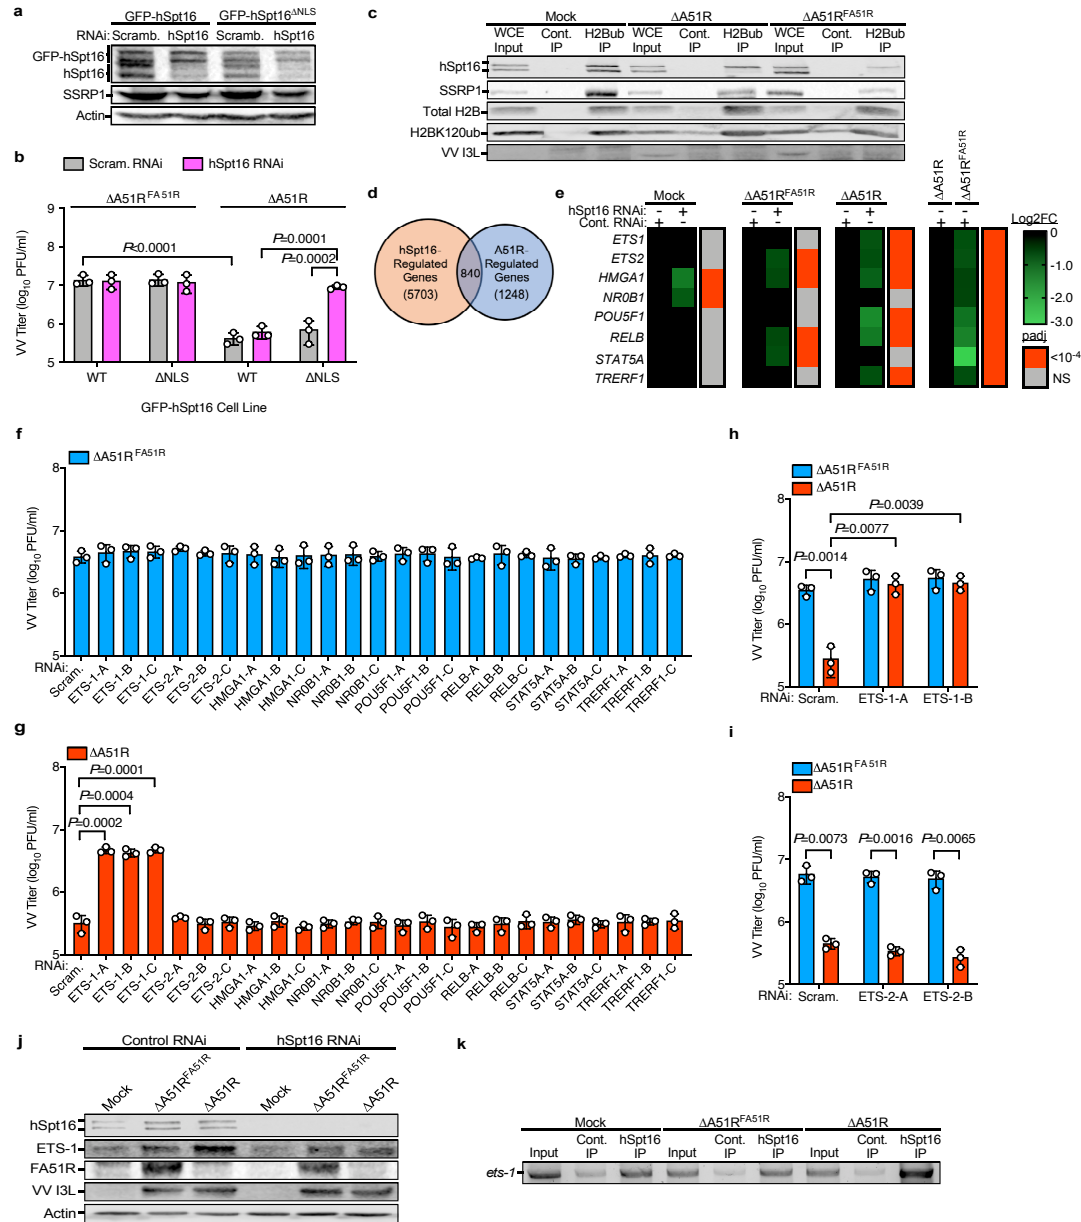

515

516

517 **Figure 5| hSpt16<sup>SUMO</sup>-SSRP1 (FACT) complexes bind transcriptionally active chromatin**  
 518 **during infection to activate ETS-1 expression and VV restriction, which is antagonized by**  
 519 **VV A51R.**

520 **a**, IB of U2OS WCE expressing WT or  $\Delta$ NLS GFP-hSpt16 48 h post-RNAi.

521 **b**, VV titers 48 hpi (MOI=0.01) of cell lines treated as in **(b)**. Data are means  $\pm$  SD; n=3.

522 **c**, IB of Co-IP of FACT subunits with H2BK120ub in U2OS nuclear extracts 18 hpi with VV strains.

523 WCE inputs indicate total protein levels prior to nuclear protein extraction and equal division into

524 control or H2BK120ub Ab IPs.

525 **d**, Non-proportional Venn diagram showing total human DEGs after hSpt16 RNAi across mock-  
526 and VV-infected samples and overlap with DEGs between  $\Delta A51R^{FA51R}$  and  $\Delta A51R$  infections in  
527 control RNAi conditions.

528 **e**, Heat map of relative RNA-seq expression level of immunity-related TFs found to be  
529 FACT/A51R-regulated genes under indicated RNAi/infection conditions. Heat maps indicate  
530 relative log<sub>2</sub>-fold change (decrease) and adjusted *P* values.

531 **fg**, VV titers 48 hpi for TF RNAi screens using  $\Delta A51R^{FA51R}$  (**f**) and  $\Delta A51R$  (**g**) in A549 cells  
532 (MOI=0.01). Data are means  $\pm$  SD; n=3.

533 **h,i**, VV titers in A549 cells 48 hpi (MOI=0.01) after ETS-1 (**h**) or ETS-2 (**i**) RNAi. Data are means  
534  $\pm$  SD; n=3.

535 **j**, IB of ETS-1 in WCE of control or hSpt16-shRNA-expressing A549 cell lines 4 hpi with VV strains  
536 (MOI=10).

537 **k**, Agarose gel image of ChIP-PCR assay of *ets-1* promoter-proximal region<sup>31</sup> after control or  
538 hSpt16 Ab-based ChIP in A549 cells under infection conditions as in (**j**).

539 Images in **a**, **c**, and **j-k**, are representative of at least two independent experiments. Statistical  
540 significance in **f-i** was determined by unpaired two-tailed Student's *t*-test. Only statistical  
541 comparisons with *P*<0.05 are shown.

542

543

544

545

546

547

548

549

550

551

552

553

554

555

556

557

558

Figure 6

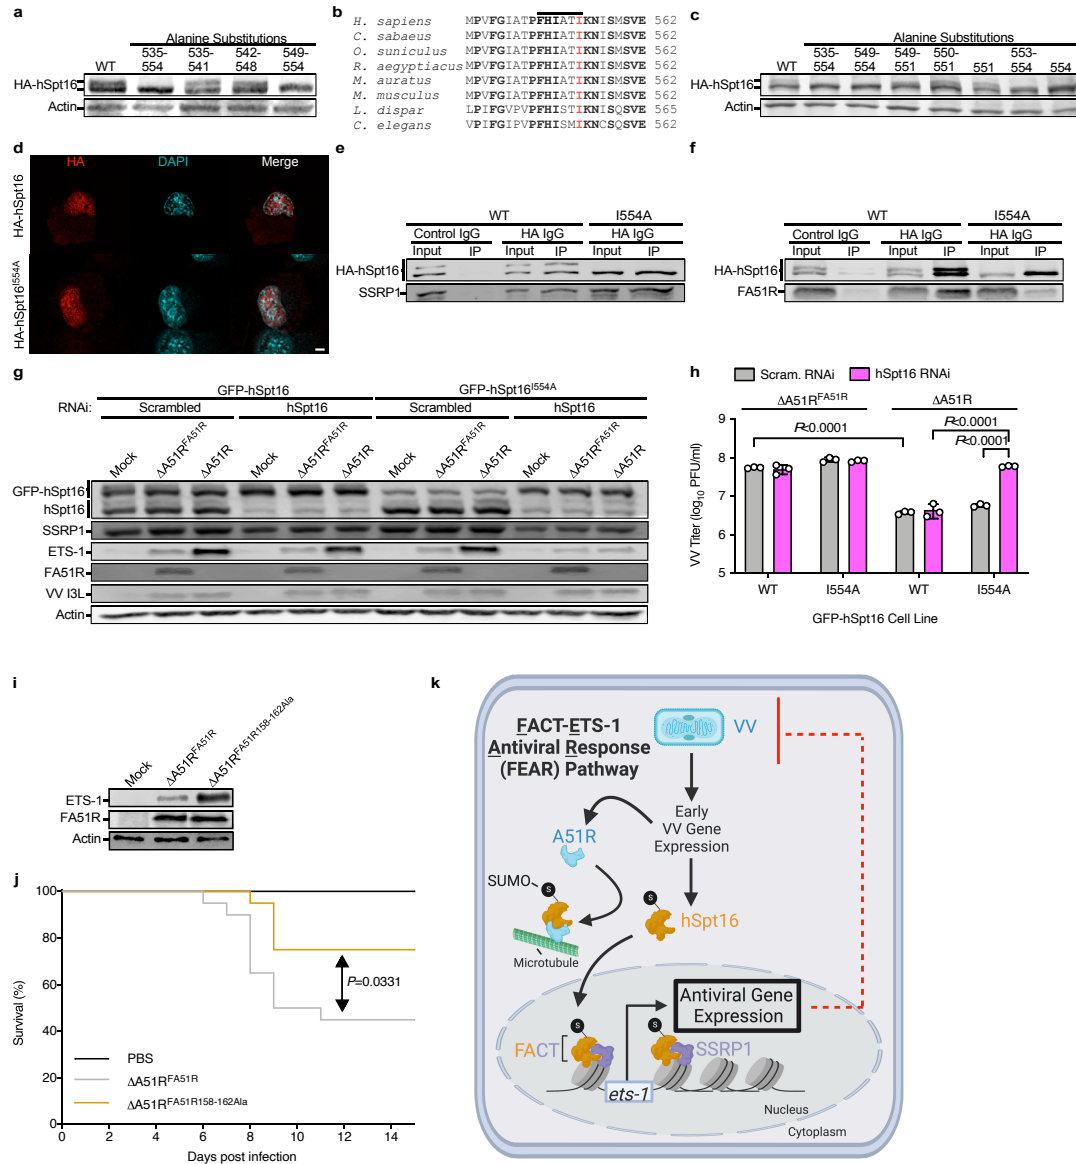

559

560

561 **Figure 6| hSpt16<sup>SUMO</sup> is required for ETS-1 expression and virus restriction, VV A51R-**

562 **hSpt16<sup>SUMO</sup> interaction suppresses ETS-1 expression and promotes VV virulence, and**

563 **model for FACT-ETS-1 Antiviral Response (FEAR) pathway.**

564 **a**, IB of 293T WCE transfected with WT or mutant HA-hSpt16 constructs encoding alanine

565 substitutions throughout indicated hSpt16 a.a. regions.

566 **b**, Conservation of hSpt16 motif required for SUMOylation (horizontal line).

567 **c**, IB of 293T WCE transfected with WT or mutant HA-hSpt16 constructs encoding alanine

568 substitutions as indicated hSpt16 a.a. from (**b**).

569 **d**, IF images of transfected WT and I554A mutant HA-hSpt16 constructs in U2OS cells.

570 **e**, IB of Co-IP of transfected WT and mutant HA-hSpt16 constructs with SSRP1 in 293T WCE.  
571 **f**, IB of Co-IP of transfected WT and mutant HA-hSpt16 constructs with co-transfected FA51R  
572 constructs in 293T WCE.  
573 **g**, IB of U2OS WCE from cells stably expressing WT or I554A mutant GFP-hSpt16 that were  
574 transfected with scrambled or hSpt16 siRNAs for 48 h and then infected with indicated VV  
575 (MOI=10) for 4 h.  
576 **h**, VV titers 48 hpi (MOI=0.01) in cell lines from **g** after indicated RNAi. Data are means  $\pm$  SD;  
577 n=3.  
578 **i**, IB of A549 WCE from cells infected with indicated VV (MOI=10) for 4 h.  
579 **j**, Percent mice (n=20 over two independent experiments) alive after VV infection.  
580 **k**, Model for FACT-ETS-1 Antiviral Response (FEAR) Pathway. VV early gene expression triggers  
581 hSpt16<sup>SUMO</sup> nuclear accumulation and formation of FACT complexes containing hSpt16<sup>SUMO</sup> that  
582 license FACT to associate with H2BK120ub sites in transcriptionally active chromatin and activate  
583 ETS-1 expression. ETS-1 subsequently activates antiviral gene expression to restrict VV  
584 replication. VV A51R is expressed early during infection<sup>8</sup> and inhibits FEAR pathway by tethering  
585 hSpt16<sup>SUMO</sup> to MTs and blocking its nuclear import. A51R may also prevent FACT complex  
586 formation in the cytosol by outcompeting SSRP1 for hSpt16<sup>SUMO</sup> binding, which would also serve  
587 to prevent nuclear accumulation of hSpt16<sup>SUMO</sup>-containing FACT complexes (not shown). Image  
588 created with BioRender.com.  
589 Images in **a-g**, and **i** are representative of at least two independent experiments. Statistical  
590 significance in **h** was determined by unpaired two-tailed Student's t-test and by Log-Rank (Mantel-  
591 Cox) tests in **j**. Only statistical comparisons with  $P < 0.05$  are shown.

592

## 593 **Methods**

594 Specific details regarding the source of all key experimental reagents (primers, plasmids, Abs,  
595 cell lines, etc.) can be found in **Supplementary Table 2**.

596 **Cell lines and primary cultures.** Mammalian cell lines were maintained at 37°C in 5% CO<sub>2</sub>  
597 atmosphere. A549, U2OS, HEK293T, HeLa, L929, SIRC, R06E, and BHK-21 cells were cultured  
598 in DMEM supplemented with 10% FB Essence (FBE) (Avantor Seradigm). BSC-40 cells were  
599 passaged in MEM containing 5% FBE. All media additionally contained 1% non-essential amino  
600 acids, 1% L-glutamine, and 1% antibiotic/antimycotic (Gibco). Primary NHDF were passaged in  
601 fibroblast growth medium (ATCC) supplemented by Fibroblast Growth Kit with low serum (ATCC).

602 LD652 and Sf21 cells were cultured as previously described at 27°C under normal atmospheric  
603 conditions<sup>8, 40</sup>.

604 **Viruses.** Stock preparation and culture of WT and recombinant VV and VSV-GFP<sup>8</sup> stocks were  
605 performed as described<sup>8</sup>. The rescue of a Flag-tagged *A51R* gene encoding alanine at positions  
606 158-162 ( $\Delta A51R^{FA51R158-162Ala}$ ) was constructed as described for the  $\Delta A51R^{FA51R}$  strain<sup>8</sup> and  
607 sequence confirmed by Sanger sequencing of the *A51R* locus. Stocks of YFV-17D-Venus<sup>38</sup> were  
608 obtained from Dr. John Schoggins, and virus particles were collected from culture supernatants  
609 after amplification in BHK-21 cells under low MOI conditions. All virus stocks were titrated by  
610 plaque assay (VV and VSV-GFP) or fluorescent foci assay (YFV-17D-Venus) on BSC-40  
611 monolayers, with a 1.5% low-melting point agarose (Invitrogen) overlay used for RNA viruses<sup>8</sup>.

612 Experimental viral infections were incubated for 1 h in serum free DMEM at 37°C before the  
613 inoculum was replaced with complete media for the remainder of the infection. Where indicated,  
614 virus particles were heat-inactivated prior to infection as described<sup>8</sup>. Where indicated,  
615 replacement media after 1 h of infection contained 200 µg/ml AraC (Sigma) and was kept in the  
616 media until protein extraction<sup>8</sup>. Lentivirus production in 293T cells via three plasmid transient  
617 transfection followed protocols described previously<sup>41</sup>.

618  
619 **Virus yield assays.** For VV: at indicated times post-infection infected cell cultures (supernatants  
620 and cells) were both collected by scraping cells into the media, subjected to three rounds of  
621 freeze-thaw to release intracellular virus particles and titers were determined by plaque assay on  
622 6-well dishes containing BSC-40 cell monolayers. For VSV and YFV: at indicated times post-  
623 infection infected cell culture supernatants were collected, clarified by centrifugation, and clarified  
624 supernatant titers were determined by plaque assay (VSV-GFP) or fluorescent foci assay (YFV-  
625 17D-Venus) on 6-well dishes containing BSC-40 cell monolayers containing a 1.5% low-melting  
626 point agarose overlay.

627 **Mouse experiments.** Six-week-old male BALB/c mice were obtained from the UFMG central  
628 animal facility (Belo Horizonte, Brazil) and were kept in ventilated cages with food and water ad  
629 libitum. Animals were anaesthetized by intra-peritoneal injection of ketamine and xylazine  
630 (70 mg/kg and 12 mg/kg of body weight in PBS, respectively). The intranasal route was used to  
631 inoculate 10 µL of PBS or 10 µL of purified viruses (100 PFU) diluted in PBS. Animals were  
632 monitored daily for body weight and survival over 15 days and were euthanized if more than 30%  
633 of their initial body weight was lost<sup>42</sup>.

634 **Ethics approval.** All mouse model studies were approved by the Committee of Ethics for Animal  
635 Experimentation (CETEA) from UFMG, under permission 9/2019.

636 **Expression vectors.** Flag-GFP, VV Flag-A51R, ECTV Flag-A51R, CPXV Flag-A51R, and YLDV  
637 Flag-A51R pCDNA3 vectors have been described<sup>8</sup>. The Mpox Flag-A51R gene with flanking *SacII*  
638 and *PacI* sites was synthesized by Gene Universal and cloned into pCDNA3 using *SacII/PacI*. N-  
639 terminal GFP-Flag-tagged A51R expression vectors were constructed by cloning a *SacII/NotI*  
640 fragment from FA51R pCDNA3 into pGFP-C3. GFP-A51R truncations were created by PCR  
641 amplification of fragments from A51R templates using iProof DNA Polymerase (Bio-Rad) and  
642 cloned into the pGFP-C3 vector. The mutant FA51R encoding alanine substitutions at residues  
643 158-162 was synthesized (Gene Universal) and cloned into pCDNA3 using *SacII/PacI* cut sites.

644 Full length HA-hSpt16 pEZ-M06 vector was from GeneCopoeia. HA-hSpt16 mutant fragments  
645 (e.g.  $\Delta$ 758-893, 535-554<sup>Ala</sup>, 549-554<sup>Ala</sup>, all K-to-A fragments, etc.) were synthesized (Gene  
646 Universal) and subcloned back into the pEZ-M06 vector using appropriate cut sites. GFP-hSpt16  
647 pReceiver lentivirus constructs were purchased from GeneCopoeia. Mutant hSpt16 constructs  
648 were first generated in hSpt16-pEZ-M06 (expressing HA-hSpt16) for characterization, and then  
649 cloned into pReceiver using appropriate cut sites for lentivirus production and subsequent  
650 transduction. All newly amplified products and cloned genes were sequence verified.

651 **Yeast two-hybrid screen.** The coding sequence for VV A51R was PCR-amplified from VV Flag-  
652 A51R pCDNA3 and cloned into pB66 as a C-terminal fusion to the Gal4 DNA-binding domain  
653 creating Gal4-A51R pB66. The construct was checked by sequencing the entire insert and used  
654 as a bait to screen a random-primed Human Lung Cancer cDNA library constructed into pP6  
655 (Hybrigenics Services, Paris, France). pB66 derives from the original pAS2 $\Delta\Delta$  vector<sup>43</sup> and pP6  
656 is based on the pGADGH plasmid<sup>44</sup>. 35 million clones (4-fold the complexity of the library) were  
657 screened using mating approach with YHGX13 (Y187 *ade2-101::loxP-kanMX-loxP*, *mata*) and  
658 CG1945 (*mata*) yeast strains as previously described<sup>43</sup>. His<sup>+</sup> colonies were selected on a medium  
659 lacking tryptophan, leucine and histidine. The prey fragments of the positive clones were amplified  
660 by PCR and sequenced at their 5' and 3' junctions. The resulting sequences were used to identify  
661 the corresponding interacting proteins in the GenBank database (NCBI).

662 **Cell line generation.** U2OS cell stably expressing full length Flag-hSpt16, GFP-hSpt16 or  
663 derivative mutants ( $\Delta$ NLS or I554A) were generated by lentiviral transduction, followed by  
664 puromycin (1.5  $\mu$ g/ml) selection. Generation of A549 cells stably expressing either control  
665 (pLKO.1) or hSpt16-targeted shRNAs were also produced by lentiviral transduction with

666 puromycin (2 µg/ml) selection. Newly generated cell lines underwent at least three rounds of  
667 selection prior to use in experiments.

668 **RNAi and viral infection in cell culture.** All siRNAs were obtained from Sigma's pre-designed  
669 siRNA library (see **Supplementary Table 2** for specific siRNA reagents used). Transient siRNA-  
670 mediated knockdown was achieved by reverse transfecting A549 or U2OS cells with  
671 Lipofectamine 2000 according to manufacturer's protocol for 48-72 h prior to viral infection.

672 **Antibodies.** Information regarding antibodies used in this study, including their source, is  
673 available in **Supplementary Table 2**.

674 **Immunofluorescence.** For staining U2OS GFP-hSpt16 expression cell lines under mock,  
675  $\Delta A51R^{FA51R}$ , or  $\Delta A51R$  infection conditions, cells were seeded at a density of 30,000 cells per  
676 coverslip, cultured overnight, then infected (MOI=3) for 18 hpi. Cells were fixed with methanol,  
677 incubated with blocking buffer (PBS with 1% BSA and 0.1% Triton-X) for 1 h, stained with rabbit  
678 anti-Flag Ab (Sigma) for 2 h, then incubated with Alexa Fluor-conjugated secondary Ab for 1h.  
679 Coverslips were mounted onto glass slides using ProLong™ Diamond anti-fade with DAPI  
680 (Thermo Scientific) and imaged on an Olympus Fv10i confocal laser scanning microscope  
681 equipped with Fluoview (v.4.2a) and CellSens (v.1.18) software. Similar methods were used for  
682 U2OS cells transiently transfected with HA-hSpt16 expression plasmids, with rabbit anti-HA  
683 primary Ab (Sigma) used for staining instead.

684 **General protein extraction.** Cells were washed with PBS prior to scraping and transfer into a  
685 1.5 ml microcentrifuge tube for centrifugation at 800 x g at 4°C for 15 minutes. Cell pellets were  
686 resuspended in either 1x Reporter Lysis Buffer (Promega) containing cComplete™ EDTA-free  
687 Protease Inhibitor Cocktail (Roche) and 1 mM phenylmethylsulfonyl fluoride (PMSF) and freeze-  
688 thawed prior to addition of 5x SDS-PAGE loading buffer (100 mM tris HCl, pH 6.8, 4% SDS, 12%  
689 (v/v) glycerol, 4 mM DTT, 0.02% (w/v) Bromophenol Blue) or were resuspended in Pierce RIPA  
690 buffer (containing cComplete™ EDTA-free Protease Inhibitor Cocktail and 1 mM PMSF) prior to  
691 addition of 5x SDS-PAGE loading buffer. Where indicated, cells were treated with 10 µM TA for  
692 2-4 h prior to protein harvest.

693 **Immunoprecipitation.** For transfection-based Co-IPs,  $1 \times 10^6$  293T cells were seeded prior to  
694 transfecting 5 µg of plasmid DNA using Lipofectamine 2000 (Invitrogen), according to  
695 manufacturer protocols, in OptiMEM I (Gibco) overnight. Cells were incubated for an additional  
696 24 h after being replaced with complete media. Infection-based Co-IPs involved  $4 \times 10^6$  A549 or



697 U2OS cells being seeded overnight, then infected with  $\Delta A51R^{FA51R}$  (MOI=10). Cells were  
698 harvested 18-24 hpi. Prior to cell lysis, cells were washed with equal volumes of PBS twice. Cells  
699 were lysed in IP Lysis Buffer (IPLB) (cOmplete™ EDTA-free Protease Inhibitor Cocktail, 1 mM  
700 PMSF, 25 mM Tris-HCl at pH 7.4, 150 mM NaCl, 0.5% NP-40) and subjected to shearing and  
701 sonication (two-15 second sonications with a 30 second interval). Samples were benzonase  
702 (Sigma) treated (250 units/ml) for 1 h at room temperature. 10% of “Input” was collected, and  
703 remaining lysate was end-over-end incubated with 5  $\mu$ g of primary Ab overnight at 4°C [Rabbit-  
704 anti-HA (Sigma), Rabbit-anti-Flag (Sigma), Mouse-anti-Spt16 (Biolegend), Mouse-anti-SSRP1  
705 (Biolegend), Mouse-anti-GFP (Biolegend), Mouse-anti-H2BK120ub (Active Motif). Then, lysates  
706 were incubated with PureProteome protein A/G magnetic beads (Sigma) for 1-2 h, extensively  
707 washed, and immunoprecipitants eluted in 60  $\mu$ l 2x SDS-PAGE loading buffer. IP of total  
708 SUMOylated protein fractions used either SUMO-1 or SUMO-2/3 Ab included with the Signal  
709 Seeker SUMOylation 1 or 2/3 Detection Kit (Cytoskeleton) and IPs were carried out according to  
710 the manufacturer instructions. Where indicated, nuclear isolations were processed using the  
711 Detergent Free Nuclei Isolation Kit (Invent Biotechnologies) according to manufacturer protocols  
712 prior to immunoprecipitation.

713 **Cell fractionation.** Cells were infected (MOI=10) for the indicated times prior to fractionation  
714 using the Subcellular Protein Fractionation Kit (Thermo). Where indicated, densitometry-based  
715 band quantifications were performed using ImageJ software (NIH, v. 1.51n). It is important to note  
716 that because the lysis buffer volume used in the fractionation procedure is dependent upon the  
717 initial cell pellet size (which varied between infection conditions), and the fractionation buffers  
718 were not compatible with protein quantification assays, we only compared cytosolic versus  
719 nuclear distribution of a particular protein within (and not between) each infection condition.

720 **Immunoblotting.** Protein extracts were boiled for 10 min prior to SDS-PAGE electrophoresis at  
721 50 V for approximately 4 h. Separated proteins were transferred in Towbin Buffer (BioRad) onto  
722 nitrocellulose membranes at 150 mA at 4°C for 90 min and blocked with Odyssey Blocking Buffer  
723 (LI-COR) for 1 h at room temperature. Membranes were blotted with primary Ab overnight at 4°C,  
724 with actin serving as a loading control. After 3 x 5 min PBS-T (PBS, 0.1% Tween) washes,  
725 membranes were incubated in secondary Ab conjugated to an IRDye (LI-COR) for 1 h, washed 3  
726 x 5 min in PBS-T, then a final 5 min PBS wash. Membranes were then imaged with an Odyssey  
727 Fc Imager (LI-COR).

728 **Protein purification.** His-tagged A51R (and mutants thereof) were PCR amplified from FA51R  
729 pcDNA3 templates using primers encoding an N-terminal His tag and *NcoI/NotI* cut sites used for  
730 cloning into the pET22b bacterial expression vector. His-A51R pET22b vectors were transformed  
731 into BL21(DE3) *E. coli* cells then grown in Luria broth at 37°C, induced at mid-log phase with  
732 IPTG (0.5 mM), then harvested by centrifugation (5 krpm, 20 min, 4°C) after 4 h prior to lysis by  
733 sonication in binding buffer (50 mM Tris-HCl pH 7.4, 500 mM NaCl, 10% glycerol, 50 mM  
734 imidazole, 4°C). Soluble fractions were obtained by centrifugation, supernatant loaded onto a  
735 HisTrap HP 1 ml column (GE Healthcare), washed, and eluted with elution buffer (50 mM Tris-HCl  
736 pH 7.4, 500 mM NaCl, 500 mM imidazole, 10% glycerol). Pooled His-A51R fractions were run over  
737 a Superdex 200 Increase 10/300 size-exclusion chromatography (SEC) column (GE Healthcare),  
738 exchanged into Storage Buffer (50 mM Tris-HCl pH 7.4, 500 mM NaCl, 10% glycerol) and  
739 concentrated prior to storage. His-tagged mCherry (mCherry-His) was PCR amplified from  
740 pmCherry-C1 vector (Takara) templates with primers encoding a His-tag and *NcoI/NotI* cut sites  
741 (Takara), cloned into pET22b, and expressed and purified using HisTrap HP 1ml columns as  
742 described above.

743 Flag-hSpt16 proteins were purified from HeLa cells transduced with Flag-hSpt16-expressing  
744 lentivirus following protocols previously described<sup>45</sup> with minor modifications. Briefly, cells were  
745 grown to confluency and harvested in PBS prior to centrifugation at 1,200 x g, 15 min, 4°C. Cells  
746 were subsequently lysed in Buffer A (20 mM Tris pH7.5, 0.2 M NaCl, 5% glycerol, 0.01 mM Octyl-  
747 beta-D-thioglucopyranoside, 2 mM DTT, 250 units/ml benzonase) via sonication. Lysates were  
748 subjected to centrifugation at 18,000 rpm for 15 min, 0.22 µm filtered, then poured onto loaded  
749 onto a pre-equilibrated HiTrap DEAE FF 5 ml column (GE Healthcare) into Buffer B (20 mM Tris  
750 pH 7.5, 1.0 M NaCl, 5% glycerol, 0.01 mM Octyl-beta-D-thioglucopyranoside, 2 mM DTT). Flag-  
751 hSpt16 containing fractions were combined and incubated with M2 resin (Sigma) overnight. M2  
752 resin was washed using a gravity flow column (Bio-Rad) then competed off with Flag peptides  
753 (0.5 mg/ml) for 30 min. Samples were eluted in M2 buffer and Flag-Spt16 containing fractions  
754 were pooled, concentrated using Amicon centrifugal filter unit (50 kDa cut-off, Millipore), aliquoted,  
755 snap frozen in liquid nitrogen and stored at 80°C. Where indicated, Flag-hSpt16 proteins were  
756 incubated with 12.5 U of recombinant ULP-1 SUMO Protease (Sigma) for 16 h at 4°C to remove  
757 SUMO moieties.

758 His-tagged SSRP1 was PCR amplified from SSRP1 pReceiver (GeneCopoeia) using primers  
759 encoding an N-terminal His tag and *NdeI/NotI* cut sites for cloning into pET22b. His-SSRP1  
760 pET22b was used to transform BL21(DE3) cells that were grown at 37°C in standard Luria-Bertani

761 medium plus appropriate antibiotics. Expression was induced by the addition of IPTG to a final  
762 concentration of 0.5 mM at OD 600 nm = 0.5 AU. Cultures were incubated for 4 h after induction  
763 and the cells were harvested by centrifugation (5,000 rpm, 20 min, 4°C). The bacterial pellet was  
764 resuspended in binding buffer (50 mM Tris-HCl pH 7.4, 500 mM NaCl, 10% glycerol, 50 mM  
765 imidazole) at 4°C. Cell lysis was carried out by sonication and the soluble fraction was obtained  
766 by centrifugation (10,000xg, 30 min, 4°C).

767  
768 The supernatant was filtered with a 0.22 µm filter and was loaded onto a pre-equilibrated HisTrap  
769 HP 1 ml column (GE Healthcare) at 0.5 ml/min with a peristaltic pump at 4°C. The column was  
770 washed with 10 column volumes of binding buffer and the column was eluted by 5 column  
771 volumes of elution buffer (50 mM Tris-HCl pH 7.4, 500 mM NaCl, 500 mM imidazole, 10%  
772 glycerol). The fractions containing His-SSRP1 were concentrated with an Amicon centrifugal filter  
773 unit (50 kDa cut-off, Millipore) and buffer exchanged into storage buffer (50 mM Tris-HCl pH 7.4,  
774 500 mM NaCl, 10% glycerol). The protein was aliquoted, snap frozen in liquid nitrogen and stored  
775 at -80°C. The co-expressed/purified hSpt16 and SSRP1 proteins for use in FACT-nucleosome  
776 binding assays were expressed using a baculovirus expression system in Sf21 cells and purified  
777 as described<sup>45</sup>.

778 ***in vitro* Co-IPs and pulldowns.** For histone pulldown assays, 5 µg of His-tagged H2A:H2B or  
779 His-H3:Flag-H4 (Diagenode) and 2 µg of Flag-hSpt16 were added to 250 µl of binding buffer (50  
780 mM Tris-HCl pH 7.4, 150 mM NaCl, 0.1% NP-40, 50 mM imidazole) and the mixture was end-  
781 over-end mixed at 4°C overnight. The next day, 10% input aliquots were taken and the rest of the  
782 sample was incubated with HIS-Select® Nickel Magnetic Agarose Beads (Sigma) for 1 h,  
783 extensively washed with binding buffer, and eluted in 60 µl 2x SDS-PAGE loading buffer. For His-  
784 A51R or His-SSRP1 nickel bead pulldowns, 1.6 µg His-A51R or 2.3 µg His-SSRP1 were added  
785 to 500 µl binding buffer containing 1.5 µg Flag-hSpt16 and the pulldown was performed as  
786 described above. For Flag-hSpt16 Co-IPs, 1.6 µg His-A51R or 2.3 µg His-SSRP1 were added to  
787 500 µl of IPLB containing 1.5 µg Flag-hSpt16, and the mixture was end-over-end mixed overnight  
788 at 4°C. The next day, 10% input aliquots were taken and the rest of the sample was incubated  
789 with 5 µg of Flag Ab for 2 h, and then incubated with PureProteome protein A/G magnetic beads  
790 (Sigma) for 1 h, extensively washed, and immunoprecipitants were eluted 60 µl 2x SDS-PAGE  
791 loading buffer. For *in vitro* competition assays, His-A51R and Flag-hSpt16 or His-SSRP1 and  
792 Flag-hSpt16 proteins were incubated in binding buffer overnight to form complexes prior to  
793 addition of indicated amounts of either His-SSRP1 or His-A51R for 3 h. After this incubation

794 period, 5  $\mu$ g of SSRP1 or Flag Ab was added for 2 h, PureProteome protein A/G magnetic beads  
795 (Sigma) then added for 1 h, extensively washed, and immunoprecipitants were eluted in 60  $\mu$ l 2x  
796 SDS-PAGE loading buffer. A similar procedure was used for Flag-hSpt16-Tubulin Co-IP assays  
797 performed in the absence/presence of His-A51R but, where indicated, 5  $\mu$ g of purified porcine  
798 tubulin (Cytoskeleton) was present in protein mixtures prior to Flag Ab immunoprecipitation.

799 **Nucleosome complex reconstitution & binding assays.** Human recombinant histones H2A,  
800 H2B, H3 and H4 were expressed, refolded and purified as described<sup>46</sup>. To visualize the histone  
801 components, Atto 647N-labeled H2A–H2B and Alexa 488-labeled H3–H4 were utilized in the  
802 FACT binding assay as described<sup>45, 47</sup>. Briefly, human FACT was pre-mixed with refolded H2A-  
803 H2B at equimolar for 10 min at room temperature, followed by adding an equimolar of either (H3-  
804 H4)<sub>2</sub> tetrasome reconstituted onto 79 bp Widom 601 DNA or (H2A-H2B)-(H3-H4)<sub>2</sub> hexasome  
805 reconstituted onto 128 bp Widom 601 DNA. The binding assay was performed in 20 mM Tris-Cl,  
806 pH 7.5, 150 mM NaCl, 1 mM EDTA and 1 mM TCEP. After a 30 min incubation, the complex was  
807 visualized in 5% native PAGE by Typhoon scan. Where indicated, FACT complexes were de-  
808 SUMOylated with ULP-1 SUMO Protease (Sigma) prior to mixing with tetrasomes or hexasomes.

809 **Microtubule co-sedimentation assays.** The Microtubule co-sedimentation assay was  
810 performed as described<sup>48</sup> with minor modifications. Briefly, 40  $\mu$ M of porcine brain tubulin  
811 (Cytoskeleton Inc.) in 80 mM PIPES pH 6.9, 2 mM MgCl<sub>2</sub>, 0.5 mM EGTA, 5% glycerol, 1 mM GTP  
812 was polymerized into MTs by incubation at 37°C for 20 min. MTs were then stabilized by  
813 resuspending in 50 mM Tris-HCl, pH 6.8, 10% glycerol buffer supplemented with 100  $\mu$ M  
814 paclitaxel (Sigma). A constant amount of MT was incubated alone or with either equal  
815 concentrations of His-A51R, its mutants or mCherry-His protein as a negative control. The  
816 samples were incubated for 30 min at 37°C, then were layered over 30  $\mu$ l of a 45% glycerol  
817 cushion (50 mM Tris-HCl pH 7.4, 100 mM NaCl, 100  $\mu$ M paclitaxel, 45% glycerol) and were  
818 subsequently spun at 16,000 x g for 30 min at 37°C to pellet MTs and bound proteins. Supernatant  
819 and pellet fractions were separated and resuspended in 2x SDS-PAGE loading buffer, and equal  
820 amounts of supernatant and pellet were run on 10% Tris-HCl stain-free gels (Bio-Rad). Gels were  
821 imaged using Bio-Rad ChemiDoc™ Touch Imaging System equipped with Image Lab Software  
822 (v. 6.1).

## 823 **RNA-Sequencing**

824 **RNA extraction.** A549 cells expressing control or hSpt16 shRNA were mock-infected or infected  
825 with  $\Delta$ A51R<sup>FA51R</sup> or  $\Delta$ A51R strains for 1 h (MOI=50). Following infection, complete media was

826 added and incubated until 4 hpi when cells were lysed, and total RNA was extracted using the  
827 RNeasy Mini kit (Qiagen) according to manufacturer's protocol.

828 **Library Preparation and Sequencing.** RNA samples were quantified using Qubit 2.0  
829 Fluorometer (Life Technologies, Carlsbad, CA, USA) and RNA integrity was checked using  
830 Agilent TapeStation 4200 (Agilent Technologies, Palo Alto, CA, USA). rRNA depletion was  
831 performed using Ribozero rRNA Removal Kit (Illumina, San Diego, CA, USA). RNA sequencing  
832 library preparation used NEBNext Ultra RNA Library Prep Kit for Illumina by following the  
833 manufacturer's recommendations (NEB, Ipswich, MA, USA). Sequencing libraries were validated  
834 using the Agilent TapeStation 4200 (Agilent Technologies, Palo Alto, CA, USA), and quantified by  
835 using Qubit 2.0 Fluorometer (Invitrogen, Carlsbad, CA) as well as by quantitative PCR (Applied  
836 Biosystems, Carlsbad, CA, USA). The sequencing libraries were clustered on two lanes of a  
837 flowcell. After clustering, the flowcell was loaded on the Illumina HiSeq instrument (4000 or  
838 equivalent) according to manufacturer's instructions. The samples were sequenced using a  
839 2x150bp Paired End (PE) configuration. Image analysis and base calling were conducted by the  
840 HiSeq Control Software (HCS). Raw sequence data (.bcl files) generated from Illumina HiSeq  
841 was converted into fastq files and de-multiplexed using Illumina's bcl2fastq 2.17 software. One  
842 mismatch was allowed for index sequence identification.

843 **Data Analysis.** Quality of the raw FASTQ files were checked using FASTQC  
844 (<https://www.bioinformatics.babraham.ac.uk/projects/fastqc/>). Trimmomatic (v.0.36) removed  
845 possible adapter sequences and nucleotides with poor quality<sup>49</sup>. Trimmed reads were mapped to  
846 the Human (hg38/GRCh38) using the STAR aligner (v.2.5.2b)<sup>50</sup>. Using the aligned BAM files,  
847 unique gene hit counts were calculated by using featureCounts<sup>51</sup>. Following extraction of gene hit  
848 counts, DESeq2 (v.1.20) was used for differential expression analysis by comparing gene  
849 expression between the sample groups<sup>52</sup>. The Wald test was used to generate p-values and log2  
850 fold changes. Genes with adjusted p-values <0.05 and absolute log2 fold changes >1 were  
851 termed differentially expressed genes for each comparison then further curated using an adjusted  
852 p-value <0.01 and absolute log2 fold change >0.58 to generate a DEG list. We then identified  
853 overlapping genes across multiple conditions at 4 hpi and generated a master list of hSpt16-  
854 regulated genes by combining comparisons where differential gene expression was dependent  
855 only on hSpt16 expression regardless of the presence of infection. This list was overlapped with  
856 conditions where differential expression was dependent on A51R. The resulting gene list indicates  
857 DEGs that were dependent on hSpt16 and A51R (**Fig. 5e, Supplementary Table 1g**). The  
858 overlapping DEGs in **Fig. 5e** that were down-regulated after hSpt16 RNAi and down-regulated in

859 the presence of A51R were further analyzed for immune system related function. Genes were  
860 curated as "immunity genes" if they were found to belong to the "immune system process (GO:  
861 0002376)" or "response to stimulus (GO: 0050896) gene ontology groups using PANTHER<sup>53</sup>  
862 (v.17.0) or QuickGO<sup>54</sup> or if evidence was found for immune system involvement through manual  
863 literature research (**Supplementary Table 1f**). This list was then interrogated for genes encoding  
864 known TFs. The relative expression of 8 immunity-related TF genes identified among this gene  
865 list were then displayed in heat map-based presentations of these data (**Fig. 5f**) using Graphpad  
866 Prism (v.8.0) software.

867 **ChIP-PCR.** For each treatment, 15 x 10<sup>6</sup> A549 cells were subjected to ChIP using Go-ChIP-Grade  
868 anti-Spt16 mouse Ab or isotype control Ab (BioLegend) and ChIP-IT® Express Chromatin  
869 Immunoprecipitation Kits (Active Motif) protocols according to manufacturer protocols. Input and  
870 immunoprecipitated DNA was then subjected to PCR reactions containing iProof DNA  
871 Polymerase (Bio-Rad) and primers targeting a promoter-proximal region of the *ets-1* gene (chr11:  
872 nts 128,391,556-128,392,408) previously identified in hSpt16 ChIP-seq studies<sup>31</sup>.

873 **Statistical analyses.** All statistical analyses were conducted using GraphPad Prism (v.8.0)  
874 software and *P* values <0.05 were considered statistically significant. Sample sizes, statistical  
875 tests used, and *P* values (only those <0.05, indicated with horizontal brackets of treatments being  
876 compared) are indicated in the respective figure legend or figure for each quantitative experiment.  
877 *P* values <0.0001 are indicated as "*P*<0.0001" rather than with exact *P* values.

#### 878 **Biological materials.**

879 Plasmids, primers, strains, and any other research reagents generated by the authors will be  
880 distributed upon request to other research investigators under a Material Transfer Agreement.

#### 881 **Data availability**

882 The authors declare that the main data supporting the findings of this study are available within  
883 the article and its Supplementary Information. RNA-seq data sets are available under Geo  
884 accession: GSE185829. Any additional information required to reanalyze the data reported in this  
885 paper is available from the corresponding author upon request.

886

#### 887 **Extended Data**

Extended Data Fig. 1

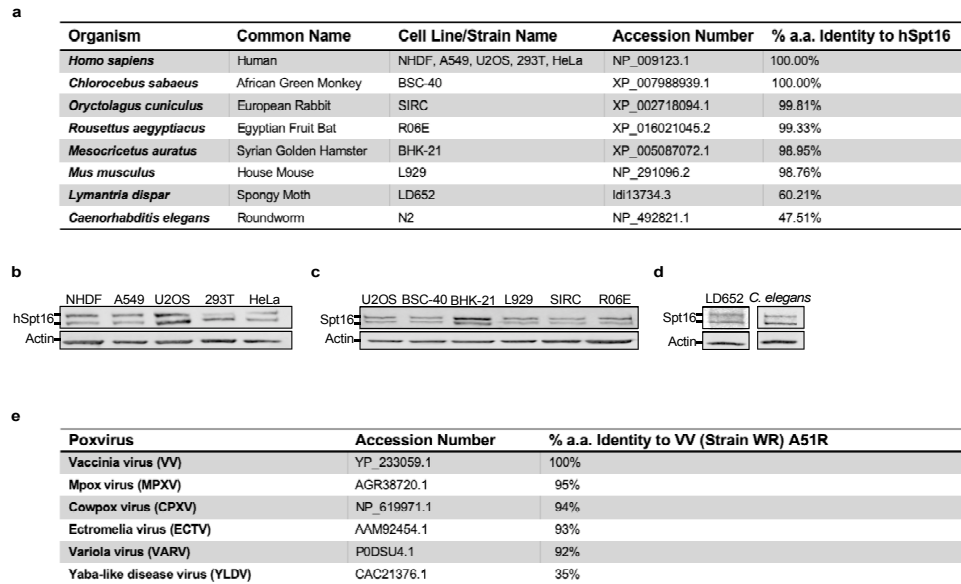

888  
889  
890  
891  
892  
893  
894  
895  
896  
897  
898  
899  
900  
901  
902  
903  
904  
905  
906

**Extended Data Fig. 1| Conservation of Spt16, Spt16 SUMOylation, and poxvirus A51R proteins.** **a**, Amino acid (a.a.) similarity of eukaryotic Spt16 proteins. **b-d**, IB of endogenous Spt16 proteins from indicated human (**b**) and mammalian animal cell lines (**c**) and from invertebrate cell lines and animal tissues (*C. elegans*) (**d**) showing SUMOylated and non-SUMOylated Spt16 forms. Non-human cell lines derive from the following: BSC-40 (*Chlorocebus sabaeus*); BHK-21 (*Mesocricetus auratus*); L929 (*Mus musculus*); SIRC (*Oryctolagus cuniculus*); R06E (*Rousettus aegyptiacus*); and LD652 (*Lymantria dispar*). **e**, Overall amino acid similarity of indicated poxvirus A51R proteins. Images in **b-d**, are representative of at least two independent experiments.

Extended Data Fig. 2

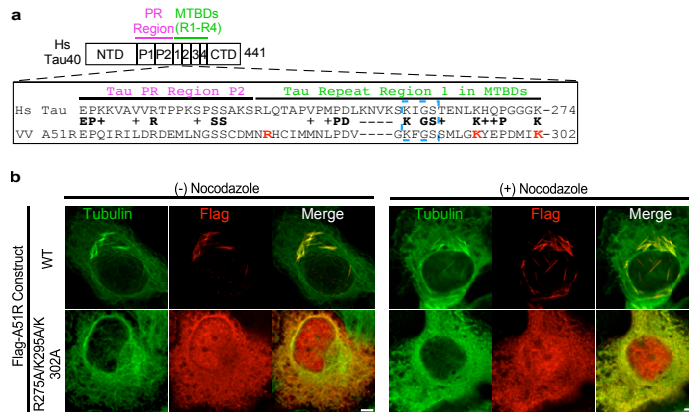

907

908

909

910

911

912

913

914

915

916

917

918

919

920

921

922

923

924

925

926

927

928

929

930

931

932

**Extended Data Fig. 2| A Tau-like motif in VV A51R mediates MT interaction. a**, Alignment of VV A51R with Proline Rich (PR) Region and Region 1 of human Tau40 MT-binding domains (MTBD)<sup>55</sup>. "KXGS" motif conserved in all four MTBDs in Tau is boxed. Residues in red indicate those converted to alanine in the triple A51R mutant. **b**, IF staining of U2OS cells transfected with WT or triple mutant FA51R expression constructs after 24 h. Where indicated, 40  $\mu$ M nocodazole was added to depolymerize MTs 6 h post-transfection MTs. Scale bar, 5  $\mu$ m. Images in **a,b** are representative of at least two independent experiments.



Extended Data Fig. 3

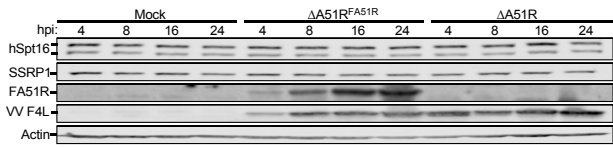

933  
934  
935  
936  
937  
938  
939  
940  
941  
942  
943  
944  
945  
946  
947  
948  
949  
950  
951  
952  
953  
954  
955  
956  
957  
958  
959  
960  
961  
962  
963

**Extended Data Fig. 3 | VV A51R does not affect total hSpt16 protein levels.** IB of hSpt16 in U2OS WCE at indicated times post-infection in U2OS WCE (MOI=3). Image is representative of two independent experiments.

Extended Data Fig. 4

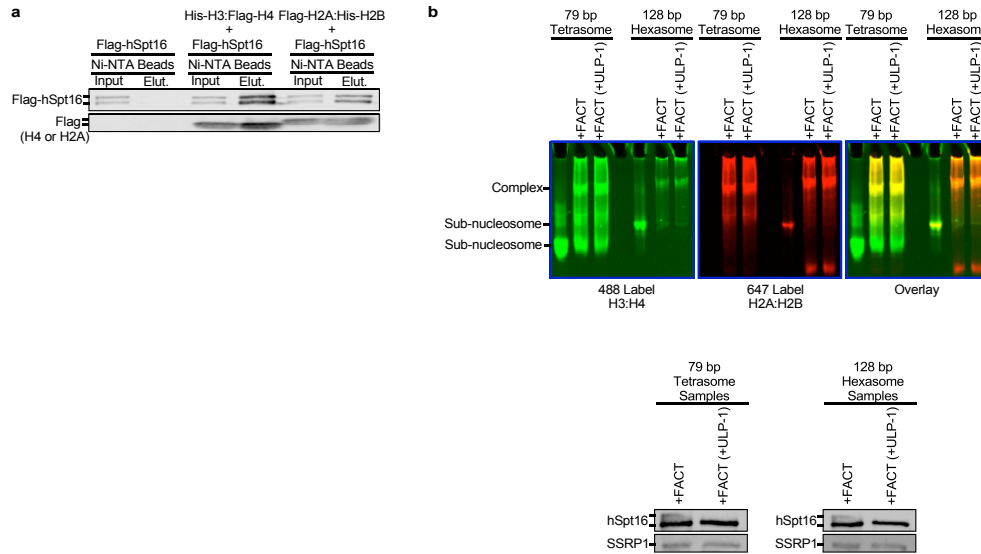

964  
965  
966  
967  
968  
969  
970  
971  
972  
973  
974  
975  
976  
977  
978  
979  
980  
981  
982  
983  
984  
985  
986

**Extended Data Fig. 4| hSpt16 SUMOylation does not affect histone or nucleosome interactions *in vitro*.** **a**, *in vitro* nickel bead pulldown of His-tagged H3/H4 and H2A/H2B complexes with purified Flag-hSpt16. **b**, *in vitro* FACT binding assay with reconstituted (H3-H4)<sub>2</sub> tetrasomes or (H2A-H2B)-(H3-H4)<sub>2</sub> hexasomes<sup>45</sup>. Where indicated, purified FACT complexes were treated with ULP-1 to remove hSpt16 SUMOylation prior to being added to binding assays. IBs of FACT treatments are shown below indicating hSpt16 and SSRP1 levels. Images in **a,b** representative of two independent experiments.

## Extended Data Fig. 5

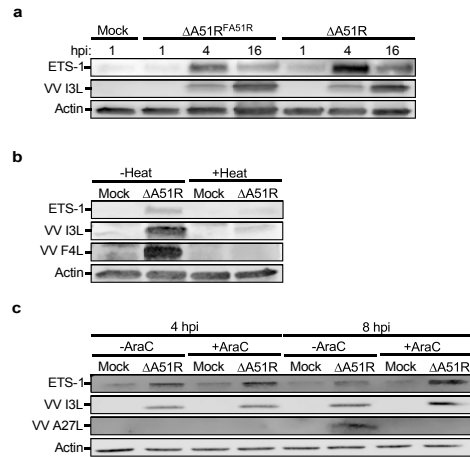

987

988

989

**Extended Data Fig. 5| ETS-1 induction by VV infection occurs by 4 hpi and requires early VV gene expression but not viral DNA replication.** **a**, IB of ETS-1 in WCE from A549 cells infected with indicated strains for indicated times. **b**, IB of ETS-1 in WCE from A549 cells under indicated infection conditions 4 hpi. Where indicated, inoculum was heat-inactivated prior to infection. **c**, IB of ETS-1 in WCE from A549 cells under indicated infection conditions. Where indicated, AraC was added to media 1 hpi. VV A27L is a late VV protein and its expression requires VV DNA replication. Images in **a-c** are representative of two independent experiments.

996

997

998

999

1000

1001

1002

1003

1004

1005

1006

1007

1008

1009

1010

1011

Extended Data Fig. 6

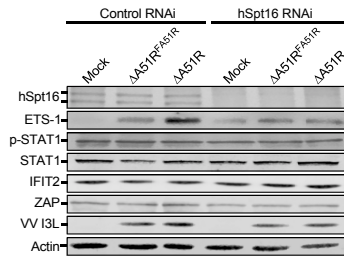

1012  
1013  
1014  
1015  
1016  
1017  
1018  
1019  
1020  
1021  
1022  
1023  
1024  
1025  
1026  
1027  
1028  
1029  
1030  
1031  
1032  
1033  
1034  
1035  
1036  
1037  
1038  
1039  
1040

**Extended Data Fig. 6| IFN pathway activation in A549 cells is unchanged between  $\Delta A51R^{FA51R}$  and  $\Delta A51R$  infections or in the presence of hSpt16 depletion.** a, IB of activated IFN pathway signaling components (phospho-STAT1) and IFN-stimulated gene (ZAP, IFIT2) expression in WCE of control or hSpt16-shRNA-expressing A549 cell lines 4 hpi with indicated VV strains (MOI=10). Image is representative of two independent experiments.

## Extended Data Fig. 7

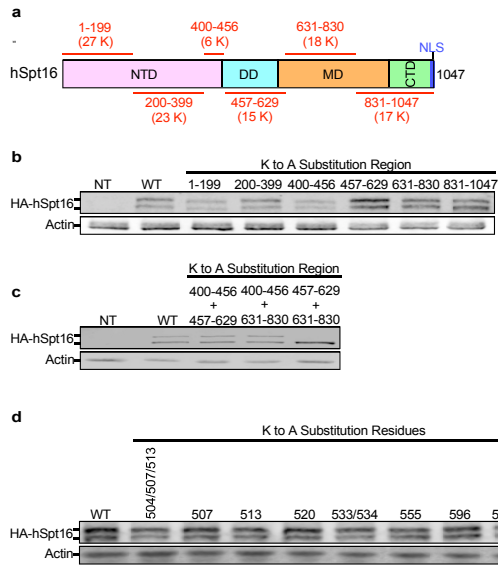

1041  
1042  
1043 **Extended Data Fig. 7 | Characterization of hSpt16 SUMOylation site(s).** **a**, hSpt16 protein map  
1044 indicating regions containing K to A substitutions in HA-hSpt16 mutant constructs and the number  
1045 of K residues in each region. **b,c**, IB of WT and mutant HA-hSpt16 transfected constructs in 293T  
1046 WCE containing K to A substitutions at all K residues within indicated a.a. regions of hSpt16. **d**,  
1047 IB of WT and mutant HA-hSpt16 transfected constructs in 293T WCE containing K to A  
1048 substitutions at indicated sites in hSpt16. Images in **b-d** are representative of at least two  
1049 independent experiments.

1050  
1051  
1052  
1053  
1054  
1055  
1056  
1057  
1058  
1059  
1060  
1061  
1062  
1063  
1064

1065 **Supplementary Information**

1066

1067 **Supplementary Table 1| RNA-seq analyses 4 hpi in mock-,  $\Delta A51R^{FA51R}$ , and  $\Delta A51R$ -infected**  
1068 **control shRNA- or hSpt16 shRNA-expressing A549 cells.**

1069 1a-Guide to Supplementary Table 1.

1070 1b-DEGs in mock-infected cells after hSpt16 RNAi.

1071 1c-DEGs in  $\Delta A51R^{FA51R}$ -infected cells after hSpt16 RNAi.

1072 1d-DEGs in  $\Delta A51R$ -infected cells after hSpt16 RNAi.

1073 1e-DEGs after hSpt16 RNAi in either mock or VV-infected conditions.

1074 1f-DEGs between  $\Delta A51R^{FA51R}$  and  $\Delta A51R$  under control RNAi conditions.

1075 1g-DEGs from hSpt16 RNAi experiments that are also DEGs between  $\Delta A51R^{FA51R}$  and  $\Delta A51R$   
1076 infections.

1077 1h- Immunity-related DEGS from Table S1G that are down-regulated in one or more hSpt16 RNAi  
1078 treatments and that are also down-regulated between  $\Delta A51R^{FA51R}$  and  $\Delta A51R$  infections.

1079

1080 **Supplementary Table 2| Key Experimental Reagents.**

1081

1082 **References**

- 1083
- 1084 1. Nan, Y., Nan, G. & Zhang, Y.J. Interferon induction by RNA viruses and antagonism by  
1085 viral pathogens. *Viruses* **6**, 4999-5027 (2014).
- 1086
- 1087 2. Beachboard, D.C. & Horner, S.M. Innate immune evasion strategies of DNA and RNA  
1088 viruses. *Curr. Opin. Microbiol.* **32**, 113-119 (2016).
- 1089
- 1090 3. McFadden, G. Poxvirus tropism. *Nat. Rev. Microbiol.* **3**, 201-213 (2005).
- 1091
- 1092 4. Yang, Z. Monkeypox: A potential global threat? *J. Med. Virol.* **94**, 4034-4036 (2022).
- 1093
- 1094 5. Mohapatra, R.K. *et al.* Unexpected sudden rise of human monkeypox cases in multiple  
1095 non-endemic countries amid COVID-19 pandemic and salient counteracting strategies:  
1096 Another potential global threat? *Int. J. Surg.* **103**, 106705 (2022).
- 1097
- 1098 6. Yu, H., Bruneau, R.C., Brennan, G. & Rothenburg, S. Battle Royale: Innate Recognition  
1099 of Poxviruses and Viral Immune Evasion. *Biomedicines* **9** (2021).
- 1100
- 1101 7. Reus, J.B., Rex, E.A. & Gammon, D.B. How to Inhibit Nuclear Factor-Kappa B Signaling:  
1102 Lessons from Poxviruses. *Pathogens* **11** (2022).
- 1103
- 1104 8. Gammon, D.B. *et al.* A single vertebrate DNA virus protein disarms invertebrate  
1105 immunity to RNA virus infection. *Elife* **3** (2014).
- 1106
- 1107 9. Orphanides, G., Wu, W.H., Lane, W.S., Hampsey, M. & Reinberg, D. The chromatin-  
1108 specific transcription elongation factor FACT comprises human SPT16 and SSRP1  
1109 proteins. *Nature* **400**, 284-288 (1999).
- 1110
- 1111 10. Orphanides, G., LeRoy, G., Chang, C.H., Luse, D.S. & Reinberg, D. FACT, a factor that  
1112 facilitates transcript elongation through nucleosomes. *Cell* **92**, 105-116 (1998).
- 1113
- 1114 11. LeRoy, G., Orphanides, G., Lane, W.S. & Reinberg, D. Requirement of RSF and FACT  
1115 for transcription of chromatin templates in vitro. *Science* **282**, 1900-1904 (1998).
- 1116
- 1117 12. Garcia, H. *et al.* Facilitates chromatin transcription complex is an "accelerator" of tumor  
1118 transformation and potential marker and target of aggressive cancers. *Cell Rep* **4**, 159-  
1119 173 (2013).
- 1120
- 1121 13. Fleishman, D. *et al.* Level of FACT defines the transcriptional landscape and aggressive  
1122 phenotype of breast cancer cells. *Oncotarget* **8**, 20525-20542 (2017).

- 1123  
1124 14. Lolis, A.A. *et al.* Myogenin recruits the histone chaperone facilitates chromatin  
1125 transcription (FACT) to promote nucleosome disassembly at muscle-specific genes. *J.*  
1126 *Biol. Chem.* **288**, 7676-7687 (2013).
- 1127  
1128 15. Minsky, N. *et al.* Monoubiquitinated H2B is associated with the transcribed region of  
1129 highly expressed genes in human cells. *Nat. Cell Biol.* **10**, 483-488 (2008).
- 1130  
1131 16. Safina, A. *et al.* Complex mutual regulation of facilitates chromatin transcription (FACT)  
1132 subunits on both mRNA and protein levels in human cells. *Cell Cycle* **12**, 2423-2434  
1133 (2013).
- 1134  
1135 17. Schoggins, J.W. *et al.* A diverse range of gene products are effectors of the type I  
1136 interferon antiviral response. *Nature* **472**, 481-485 (2011).
- 1137  
1138 18. Gasparian, A.V. *et al.* Curaxins: anticancer compounds that simultaneously suppress  
1139 NF-kappaB and activate p53 by targeting FACT. *Sci. Transl. Med.* **3**, 95ra74 (2011).
- 1140  
1141 19. Suzawa, M. *et al.* A gene-expression screen identifies a non-toxic sumoylation inhibitor  
1142 that mimics SUMO-less human LRH-1 in liver. *Elife* **4** (2015).
- 1143  
1144 20. Li, S.J. & Hochstrasser, M. A new protease required for cell-cycle progression in yeast.  
1145 *Nature* **398**, 246-251 (1999).
- 1146  
1147 21. Winkler, D.D. & Luger, K. The histone chaperone FACT: structural insights and  
1148 mechanisms for nucleosome reorganization. *J. Biol. Chem.* **286**, 18369-18374 (2011).
- 1149  
1150 22. Dehmelt, L. & Halpain, S. The MAP2/Tau family of microtubule-associated proteins.  
1151 *Genome Biol.* **6**, 204 (2005).
- 1152  
1153 23. Brameier, M., Krings, A. & MacCallum, R.M. NucPred--predicting nuclear localization of  
1154 proteins. *Bioinformatics* **23**, 1159-1160 (2007).
- 1155  
1156 24. Kosugi, S., Hasebe, M., Tomita, M. & Yanagawa, H. Systematic identification of cell  
1157 cycle-dependent yeast nucleocytoplasmic shuttling proteins by prediction of composite  
1158 motifs. *Proc. Natl. Acad. Sci. U. S. A.* **106**, 10171-10176 (2009).
- 1159  
1160 25. Pavri, R. *et al.* Histone H2B monoubiquitination functions cooperatively with FACT to  
1161 regulate elongation by RNA polymerase II. *Cell* **125**, 703-717 (2006).

1162



- 1163 26. Fleming, A.B., Kao, C.F., Hillyer, C., Pikaart, M. & Osley, M.A. H2B ubiquitylation plays a  
1164 role in nucleosome dynamics during transcription elongation. *Mol. Cell* **31**, 57-66 (2008).
- 1165  
1166 27. Sanda, C. *et al.* Differential gene induction by type I and type II interferons and their  
1167 combination. *J Interferon Cytokine Res* **26**, 462-472 (2006).
- 1168  
1169 28. Goulet, M.L. *et al.* Systems analysis of a RIG-I agonist inducing broad spectrum  
1170 inhibition of virus infectivity. *PLoS Pathog.* **9**, e1003298 (2013).
- 1171  
1172 29. Garrett-Sinha, L.A. Review of Ets1 structure, function, and roles in immunity. *Cell Mol*  
1173 *Life Sci* **70**, 3375-3390 (2013).
- 1174  
1175 30. Teng, Y. *et al.* Expression of ETS1 in gastric epithelial cells positively regulate  
1176 inflammatory response in Helicobacter pylori-associated gastritis. *Cell Death Dis.* **11**,  
1177 498 (2020).
- 1178  
1179 31. Kolundzic, E. *et al.* FACT Sets a Barrier for Cell Fate Reprogramming in Caenorhabditis  
1180 elegans and Human Cells. *Dev. Cell* **46**, 611-626 e612 (2018).
- 1181  
1182 32. Deng, L. *et al.* Suppression of NF-kappaB Activity: A Viral Immune Evasion Mechanism.  
1183 *Viruses* **10** (2018).
- 1184  
1185 33. Shaw, A.E. *et al.* Fundamental properties of the mammalian innate immune system  
1186 revealed by multispecies comparison of type I interferon responses. *PLoS Biol.* **15**,  
1187 e2004086 (2017).
- 1188  
1189 34. Rahman, M.M. & McFadden, G. Modulation of NF-kappaB signalling by microbial  
1190 pathogens. *Nat. Rev. Microbiol.* **9**, 291-306 (2011).
- 1191  
1192 35. Smale, S.T. Transcriptional regulation in the innate immune system. *Curr. Opin.*  
1193 *Immunol.* **24**, 51-57 (2012).
- 1194  
1195 36. Fry, E.A. & Inoue, K. Aberrant expression of ETS1 and ETS2 proteins in cancer. *Cancer*  
1196 *Rep Rev* **2** (2018).
- 1197  
1198 37. Dittmer, J. The role of the transcription factor Ets1 in carcinoma. *Semin. Cancer Biol.* **35**,  
1199 20-38 (2015).
- 1200  
1201 38. Hanners, N.W. *et al.* Western Zika Virus in Human Fetal Neural Progenitors Persists  
1202 Long Term with Partial Cytopathic and Limited Immunogenic Effects. *Cell Rep* **15**, 2315-  
1203 2322 (2016).

- 1204  
1205 39. Mahajan, R., Delphin, C., Guan, T., Gerace, L. & Melchior, F. A small ubiquitin-related  
1206 polypeptide involved in targeting RanGAP1 to nuclear pore complex protein RanBP2.  
1207 *Cell* **88**, 97-107 (1997).
- 1208  
1209 40. Winkler, D.D., Muthurajan, U.M., Hieb, A.R. & Luger, K. Histone chaperone FACT  
1210 coordinates nucleosome interaction through multiple synergistic binding events. *J. Biol.*  
1211 *Chem.* **286**, 41883-41892 (2011).
- 1212  
1213 41. Aboulaich, N. Lentivirus Production. *Bio Protoc* **A Bio-101: e39**. (2011).
- 1214  
1215 42. Lourenco, K.L., Chinalia, L.A., Henriques, L.R., Rodrigues, R.A.L. & da Fonseca, F.G.  
1216 Zoonotic vaccinia virus strains belonging to different genetic clades exhibit  
1217 immunomodulation abilities that are proportional to their virulence. *Virology* **18**, 124  
1218 (2021).
- 1219  
1220 43. Fromont-Racine, M., Rain, J.C. & Legrain, P. Toward a functional analysis of the yeast  
1221 genome through exhaustive two-hybrid screens. *Nat. Genet.* **16**, 277-282 (1997).
- 1222  
1223 44. Bartel, P.L. & Fields, S. Analyzing protein-protein interactions using two-hybrid system.  
1224 *Methods Enzymol.* **254**, 241-263 (1995).
- 1225  
1226 45. Wang, T. *et al.* The histone chaperone FACT modulates nucleosome structure by  
1227 tethering its components. *Life Sci Alliance* **1**, e201800107 (2018).
- 1228  
1229 46. Dyer, P.N. *et al.* Reconstitution of nucleosome core particles from recombinant histones  
1230 and DNA. *Methods Enzymol.* **375**, 23-44 (2004).
- 1231  
1232 47. Liu, Y. *et al.* FACT caught in the act of manipulating the nucleosome. *Nature* **577**, 426-  
1233 431 (2020).
- 1234  
1235 48. Kesten, C., Schneider, R. and Persson, S. *in vitro* Microtubule Binding Assay and  
1236 Dissociation Constant Estimation. *Bio Protoc* **6(6): e1759** (2016).
- 1237  
1238 49. Bolger, A.M., Lohse, M. & Usadel, B. Trimmomatic: a flexible trimmer for Illumina  
1239 sequence data. *Bioinformatics* **30**, 2114-2120 (2014).
- 1240  
1241 50. Dobin, A. *et al.* STAR: ultrafast universal RNA-seq aligner. *Bioinformatics (Oxford,*  
1242 *England)* **29**, 15-21 (2013).

1243

- 1244 51. Liao, Y., Smyth, G.K. & Shi, W. featureCounts: an efficient general purpose program for  
1245 assigning sequence reads to genomic features. *Bioinformatics* **30**, 923-930 (2013).
- 1246  
1247 52. Love, M.I., Huber, W. & Anders, S. Moderated estimation of fold change and dispersion  
1248 for RNA-seq data with DESeq2. *Genome Biology* **15**, 550 (2014).
- 1249  
1250 53. Mi, H., Muruganujan, A. & Thomas, P.D. PANTHER in 2013: modeling the evolution of  
1251 gene function, and other gene attributes, in the context of phylogenetic trees. *Nucleic  
1252 Acids Res.* **41**, D377-386 (2013).
- 1253  
1254 54. Binns, D. *et al.* QuickGO: a web-based tool for Gene Ontology searching. *Bioinformatics*  
1255 **25**, 3045-3046 (2009).
- 1256  
1257 55. Barbier, P. *et al.* Role of Tau as a Microtubule-Associated Protein: Structural and  
1258 Functional Aspects. *Front. Aging Neurosci.* **11**, 204 (2019).

1259

## 1260 **Acknowledgements**

1261

1262 We thank colleagues Drs. Ivan D'Orso, Julie Pfeiffer and Nick Conrad (UTSW) and Dr. Duane  
1263 Winkler (UT Dallas) for helpful discussions. This work was supported by grants to DBG from the  
1264 NIH (1R21AI144203-01 and 1R35GM137978-01) and Welch Foundation (I-2062-20210327) and  
1265 by funding to DBG from the UTSW Endowed Scholars Program. CP was supported by NIH  
1266 Training Grant T32 AI007520. Animal experiments were supported by funding to FG by the INCTV  
1267 Initiative.

1268

1269

## 1270 **Author contributions**

1271

1272 Conceptualization, D.B.G. and E.A.R.; Methodology, D.B.G., E.A.R.; Investigation, D.B.G., E.A.R.,  
1273 D.S., S.C., C.P., S.B.O., A.E., D.H., Y.L., R.O.; K.L., O.V.H., N.K.C.; Data Curation, D.B.G. and  
1274 SC.; Writing—original draft, D.B.G. Writing—Review & Editing, K.L., N.M.A., R.O., and F.G.;  
1275 Visualization, D.B.G. and E.A.R.; Supervision, D.B.G., K.L., N.M.A., R.O., and F.G.; Funding  
1276 Acquisition, D.B.G., C.P., and F.G.

1277

1278

1279

1280 **Competing interests**

1281

1282 The authors declare no competing interests.

1283

1284 **Additional information**

1285 **Correspondence and request for materials** should be addressed to Don Gammon.

1286
